# Supplementary material
Source: PubMed Central journal article supplement (PMC4403858)
Supplement: NIHMS665384-supplement-Supplement1.pdf [file NIHMS665384-supplement-Supplement1.pdf]

## Supplementary Appendix

This appendix has been provided by the authors to give readers additional information about their work.

Supplement to: Moran AE, Odden MC, Thanataveerat A, et al. Cost-effectiveness of hypertension therapy according to 2014 guidelines. *N Engl J Med* 2015;372:447-55. DOI: 10.1056/NEJMsa1406751

## SUPPLEMENTARY MATERIALS

### Table of Contents:

|                       |             |
|-----------------------|-------------|
| List of investigators | page 1      |
| Supplementary Methods | pages 1-10  |
| Appendix Tables       | pages 11-24 |
| Appendix Figures      | pages 25-28 |
| Appendix References   | pages 29-34 |

## LIST OF INVESTIGATORS

**Authors:** Andrew E. Moran<sup>1,2</sup>, Michelle C. Odden<sup>3</sup>, Anusorn Thanataveerat<sup>2</sup>, Keane Y. Tzong<sup>2</sup>, Petra W. Rasmussen<sup>2</sup>, David Guzman<sup>4</sup>, Lawrence Williams<sup>5</sup>, Kirsten Bibbins-Domingo<sup>4</sup>, Pamela G. Coxson<sup>4</sup>, Lee Goldman<sup>1</sup>

### Affiliations:

1. College of Physicians and Surgeons, Columbia University, New York, NY, USA
2. Division of General Medicine, Columbia University Medical Center, NY, USA
3. School of Biological and Population Health Sciences, Oregon State University, Corvallis, OR, USA
4. Division of General Internal Medicine, San Francisco General Hospital, San Francisco, CA, USA
5. Partners Health Care, Boston, MA, USA

## SUPPLEMENTARY METHODS

### Structure of the Model

The Cardiovascular Disease (CVD) Policy Model is a computer-simulation, state-transition (Markov cohort) model of coronary heart disease and stroke incidence, prevalence, mortality, and costs in the U.S. population over age 35 years.<sup>1-3</sup> The Demographic-Epidemiologic Submodel predicts coronary heart disease and stroke incidence and non-CVD mortality among subjects without CVD, stratified by age, sex, and up to 8 additional categorized risk factors estimated from weighted United States National Health and Nutrition Examination Survey (NHANES) data from 2007-2010 (**Figure S1**). Risk factors include: systolic blood pressure (<140, 140-159.9, ≥160), isolated diastolic blood pressure (normal systolic blood pressure and diastolic blood pressure (90-99 or ≥100 mmHg), antihypertensive medication treatment status (self-reported), smoking status (active smoker, non-smoker with exposure to environmental

to environmental tobacco smoke, non-smoker without environmental exposure), high density lipoprotein (HDL) cholesterol (<1.0, 1.0-1.5, ≥1.6 mmol/L; <40, 40-59.9, ≥60 mg/dL), low-density lipoprotein (LDL) cholesterol (<2.6, 2.6-3.3, ≥3.4 mmol/L; <100, 100-129.9, ≥130 mg/dL), body mass index (<25, 25-29.9, ≥30 kg/M<sup>2</sup>), diabetes mellitus (yes or no), and chronic kidney disease [estimated glomerular filtration rate of < 60 ml/min (using the Modification of Diet in Renal Disease formula), and/or proteinuria (spot albumin/creatinine ration > 200 µg/g)]. After CVD develops, the Bridge Submodel characterizes the initial stroke or coronary heart disease event (cardiac arrest, myocardial infarction, or angina) and its sequelae for 30 days. Then, the Disease History Submodel predicts subsequent CVD events, coronary revascularization procedures, CVD mortality, and non-CVD mortality among patients with CVD, stratified by age, sex, and history of events. The general chronic CVD categories are coronary heart disease only, stroke only, and combined prior coronary heart disease and prior stroke. Each state and event has an annual cost and quality-of-life adjustment as well as an annual probability of a repeat event and/or transition to a different CVD state. All population distributions, risk factor levels, coefficients, event rates, case fatality rates, costs, and quality-of-life adjustments can be modified for forecasting simulations.

## **Data Sources**

Version 4 of the CVD Policy Model includes data from prior versions as well as many updates and upgrades.<sup>1-3</sup> The 2010 U.S. Census provides the baseline population<sup>4</sup> and number of 35 year-olds projected to enter the model population from 2010-2060.<sup>5,6</sup> CHD and stroke deaths in 2010 were extracted from U.S. Vital Statistics.<sup>7</sup> Deaths were categorized according to the International Classification of Diseases (ICD) 10 codes<sup>8</sup>: I20-I25 and two-thirds of I49, I50, and I51 were used to estimate coronary heart disease deaths,<sup>9</sup> I60-I69 were used to estimate stroke deaths, and all other deaths were considered non-CVD deaths.

The incidence of coronary heart disease and stroke were based on competing risk Cox proportional hazards analysis of the Framingham Heart Study<sup>10</sup> and the Framingham Offspring Study<sup>11</sup> cohorts from 1988-2007, with further adjustment for risk factor differences between the Framingham cohorts and the contemporary U.S. population represented by the NHANES. Incident coronary heart disease events were allocated to angina pectoris, hospitalized myocardial infarction, or cardiac arrest. Prevalence, joint distributions and means of U.S. risk factor values were estimated from pooled, survey design-weighted NHANES, 2007-10.<sup>12</sup> Annual transition rates between risk factor levels were calculated to preserve age-range trends over time. Risk function betas for non-blood pressure risk factors were estimated separately for the risk of incident coronary heart disease events, incident strokes, and non-CVD deaths, using examinations 1-8 of the Framingham Offspring cohort.<sup>11</sup> The Framingham coefficients have been useful across many populations.<sup>13-16</sup> Risk factors were assumed to affect the incidence of myocardial infarction, arrest, and angina in proportion to the overall incidence of coronary heart disease, except tobacco smokers were assumed to have a higher relative risk for infarction and arrest (<sup>17</sup>; personal communication, Sean Coady, National Heart, Lung, and Blood Institute, February, 2006) and a proportionately lower coefficient for angina. Environmental tobacco exposure was assumed to carry a relative risk of 1.26 for myocardial infarction and cardiac arrest compared with non-exposed non-smokers<sup>18</sup> but not to influence angina.

Baseline CVD Policy Model inputs for the year 2010 were within 1% of all targets obtained from U.S. national data sources (**Appendix Table 1**).

Preliminary analyses suggested that the strength of the observational association between blood pressure and CVD risks in the Framingham Heart Study fell short of the strength of association observed in antihypertensive treatment trials (basis of comparison was the Law, Morris, and Wald trials meta-

analysis summary estimates).<sup>19</sup> Starting with CVD Policy Model default blood pressure beta coefficients estimated from Framingham Heart Study data, we calibrated the coefficients in order to 1) reproduce the association of change in systolic BP estimated from both the Prospective Cohort Studies Collaborative, and 2) a large pooled analysis of BP treatment trials by Law, Morris, and Wald.<sup>19</sup> A U.S. NHANES-based cohort representing the age and sex structure and mean systolic BP of the U.S. stage one and stage two hypertensive population was prepared for calibration simulations. In order to simulate the average trial pooled in the Law, Morris and Wald study, five year treatment duration was simulated. First, a base case was simulated for 2010-2014 with no change in 2010 blood pressure levels. A 2010-2014 intervention simulation followed in which systolic BP was lowered by approximately 10 mm Hg or diastolic blood pressure was lowered 5 mm Hg in each age and sex category. Beta coefficients were calibrated until the Prospective Cohort Studies Collaboration age- and sex- specific relative risks were matched within 0.02 or less (**Appendix Table 2**). Summary (age and sex weighted) relative risk with a 10 mm Hg systolic or 5 mm Hg diastolic blood pressure change for ages 35-74 years of 0.75 was within the 95% confidence limits of the treatment trials relative risks estimated in the Law, Morris, and Wald meta-analysis for coronary heart disease (target interval 0.73-0.83), as was the estimate for stroke (estimate 0.64; target interval 0.52-0.67; **Appendix Table 3**).

In order to ensure that the systolic BP relative risk inputs were not over-fitted to the calibration targets, and not representative of the results of a real clinical trial, we set out to use the model to simulate the landmark Systolic Hypertension in the Elderly Program (SHEP), a double-blind placebo-controlled trial of antihypertensive adults aged 60 and older. By analyzing individual participant-level data, we were able to enter the characteristics of the SHEP intervention arm and control arms (age, baseline systolic BP, mean HDL and LDL cholesterol, and smoking status of participants). We then simulated the SHEP trial over a five-year period (mean follow up in SHEP lasted 4.5 years). Cox proportional hazards analysis of

SHEP was performed in order to ensure that we could reproduce the estimates reported in the 1999 SHEP trial report, and we performed original analyses of SHEP data in order estimate the total stroke (fatal and nonfatal), and total and fatal coronary heart disease relative risks associated with BP treatment consistent with CVD Policy Model definitions.

For each of stroke and CHD, we simulated RRs of stroke and CHD, assuming baseline characteristics of the SHEP cohort and systolic blood pressure beta coefficients used in our main analysis (these based on the Prospective Cohort Studies Collaboration and Law, Morris, Wald meta-analysis of trials as described above). Stroke and CHD RRs resulting from the simulated trial were then compared with the main estimates and 95% confidence intervals of the observed effects reported by the SHEP trial (Appendix Table 4).

Compared with the results observed in the actual trial, our five-year simulation of the SHEP trial resulted in nearly perfectly matched results for reductions in the rate of coronary heart disease events with treatment. For stroke, our simulations yielded a 30% reduction in strokes (relative risk 0.70) compared with the 36% reduction observed in the trial (relative risk 0.64). SHEP excluded potential participants if they had a history of atrial fibrillation, but our Model cannot selectively do so. Since five-year effects of antihypertensive treatment are unlikely to lower risk for stroke caused by atrial fibrillation, the inclusion of people with atrial fibrillation likely explains why our simulated reduction of nonfatal stroke was less than that observed in SHEP. If we adjust our total stroke relative risk for an assumed 15% of all strokes (fatal and nonfatal) due to atrial fibrillation,<sup>20</sup> and unaffected by the BP lowering intervention, our simulated trial would yield a relative risk of total stroke of 0.66 (calculated as:  $\exp[1.15 \cdot \ln(0.70)]$ ), very close to the SHEP total stroke relative risk of 0.64.

The number of hospitalized myocardial infarctions was obtained from discharges coded as ICD-9 code 410 in the 2010 National Hospital Discharge Survey (NHDS)<sup>21</sup> adjusted for likely miscoding,<sup>22</sup> such as patients who were discharged alive after two days or fewer without a percutaneous coronary intervention, and transfer patients. Case-fatality rates and rates of myocardial infarction in subgroups were estimated from national data<sup>21</sup> and a variety of complementary sources.<sup>23-25</sup> Prehospital arrest deaths were estimated from the U.S. Vital Statistics,<sup>26</sup> and out-of-hospital cardiac arrests surviving to hospital discharge were estimated from national data<sup>21</sup>. Survival after a coronary heart disease event was estimated using California data on the ratio of in-hospital survival to 30 day survival<sup>27</sup> and data from Medicare and Seattle, Washington.<sup>28,29</sup> Rates of coronary revascularizations were estimated from the National Hospital Discharge Survey,<sup>21</sup> with mortalities estimated from aggregated historical data.

Stroke incidence was assumed to independent of the risk of new onset coronary heart disease in the same year. The number of hospitalized strokes was also obtained from the 2010 NHDS. Positive predictive values of specific ICD-9 stroke hospital diagnosis codes (inclusive of ICD 9 codes 430-438) were derived by pooling several studies of stroke incidence that compared hospital diagnoses with a gold standard (e.g., stroke ascertained by Atherosclerosis in Communities Study, the Rochester Epidemiology Study or similar criteria).<sup>30</sup> The positive predictive values were applied to age- and sex-specific NHDS cases in order to estimate total stroke event rates (inclusive of first-ever and recurrent stroke events). Applying 30-day case fatality rates based on the Atherosclerosis in Communities Study<sup>31,32</sup> yielded annual mortality rate estimates within the range of stroke rates reported by the U.S. Centers for Disease Control (CDC Wonder) for 2010. Incidence calibration assumed that 77% of all strokes are incident (first ever),<sup>33</sup> but it was assumed that the proportion first ever/total diminished with age (i.e., >90% of all strokes are first strokes in 35-44 year olds and 50% are first strokes in 85-94 year olds). The resulting incidence of hospitalized stroke approximated age and sex specific stroke incidence rates

observed in U.S. stroke cohort and surveillance studies. The annual probabilities of stroke after myocardial infarction<sup>34</sup> and the probability of coronary heart disease in stroke patients was based on natural history studies.<sup>35-40</sup>

The background prevalence of CVD by age, sex, and CVD disease state (stroke, coronary heart disease, or both stroke and coronary heart disease) in 2010 was estimated from the National Health Interview Survey data from 2009-2011,<sup>41</sup> assuming that the imperfect positive predictive value of survey data is offset by its imperfect sensitivity.<sup>42-44</sup> Age-specific prevalences for individual CVD disease states were fitted with polynomial or spline functions of age to obtain smooth, monotonically increasing prevalences. The background prevalence of prior coronary revascularization was estimated from revascularizations before 2010 and estimated survival after revascularization, while model projections were used to infer the distribution of revascularization by CVD state.

Age and sex specific health care costs were estimated using national data.<sup>45</sup> Hospitalized stroke and coronary heart disease costs and acute stroke rehabilitation costs were estimated using 2008 California hospital data,<sup>46</sup> deflated using cost to charge ratios<sup>47</sup> and the ratio of the U.S. national average costs to the California average.<sup>48</sup> Chronic outpatient CVD costs additional to average background health care costs for the first year after the event and for subsequent years were estimated for patients with a stroke or coronary heart disease diagnosis surveyed in the U.S. Medical Expenditure Panel Surveys (MEPS) pooled from 1998-2008. Average annual non-cardiovascular (background) costs were also estimated from the MEPS.<sup>49</sup> All model costs were indexed to the year 2010 using the medical component of the consumer price index. Health-related quality-of-life weights and severity distributions for disease states were based on the Global Burden of Disease disability weights study.<sup>50-52</sup>



## **Blood pressure treatment assumptions**

Each recommendation made by the 2014 U.S. hypertension guidelines committee was backed by review of multiple studies and assessment of the variable quality of the evidence was made explicit. However, for a quick overview of the committee's treatment recommendations, the reader may access the 2014 Hypertension Guideline Management Algorithm ([http://files.jamanetwork.com/jn/Algo\\_image.png](http://files.jamanetwork.com/jn/Algo_image.png)). In brief, after a trial period of lifestyle interventions geared at reducing blood pressure, patients with hypertension selected for pharmacologic treatment were grouped into those with or without diabetes or chronic kidney disease (CKD). The blood pressure targets for those treatment groups are shown in manuscript **Table 1**. Those without those conditions were categorized into Nonblack and Black. For initial choice of antihypertensive agent, Nonblack patients were recommended to start with any of thiazide diuretic, angiotensin converting enzyme (ACE) inhibitor, angiotensin receptor blocker (ARB) or calcium channel blocker (CCB). Black patients were recommended the same initial choice of therapies, except were not recommended to start with an ACE. Patients without diabetes but without CKD were recommended the same options as above for non-diabetics (options based on if the patient is Nonblack or Black). Patients with chronic kidney disease were recommended to start with an ACE or an ARB. Should the patient require more than one medication to reach target blood pressure, the guideline recommended any of the following: 1) maximize the first medication to full dose, then add a second agent; 2) add the second agent before maximizing the dosage of the first, or 3) start with two medication classes in combination. The 2014 committee did not recommend any particular frequency of blood pressure monitoring in treated patients, so our analysis used recommendations from the prior national guideline as well as the observed number of visits needed to achieve hypertension control in the ALLHAT trial (manuscript **Table 2**).

In keeping with the 2014 hypertension guidelines, we did not choose to simulate the effects of any particular medication; instead we simulate “standard dose” effects and assumed average drug prices across classes. Examples of standard doses for different antihypertensive medications can be found at <http://www.wolfson.qmul.ac.uk/bpchol/a3.pdf>, and include nifedipine 30 mg daily, amlodipine 5 mg daily, lisinopril 10 mg daily, hydrochlorothiazide 25 mg daily, and losartan 50 mg daily. Especially in patients with higher BPs (e.g. stage two hypertension), medications are added sequentially and BP lowered gradually over time. The amount of blood pressure change was assumed to be a function of the pre-treatment or baseline BP and the effect of a standard-dose antihypertensive agent at that pre-treatment level (**Appendix Table 5**). It is important to note that for patients with very high BPs (mean systolic BP of 185 mm Hg or more) it was assumed that even with taking four standard dose medications, these patients would on average achieve a BP of about 143 mm Hg, near, but not at, the target of 140 mmHg.

**Appendix Table S1. Comparisons of selected CVD Policy Model simulation outputs for 2010 (model base year) with national targets for 2010.**

| Age and sex category         | Total myocardial infarctions<br>Target sources: NHDS |               | Total strokes<br>Target source: NHDS |              | CHD deaths<br>Target source: national vital statistics |              | Stroke deaths<br>Target source: national vital statistics |              | All-cause deaths<br>Target source: national vital statistics |               |
|------------------------------|------------------------------------------------------|---------------|--------------------------------------|--------------|--------------------------------------------------------|--------------|-----------------------------------------------------------|--------------|--------------------------------------------------------------|---------------|
|                              | Target                                               | Model         | Target                               | Model        | Target                                                 | Model        | Target                                                    | Model        | Target                                                       | Model         |
| Males                        |                                                      |               |                                      |              |                                                        |              |                                                           |              |                                                              |               |
| 35-44                        | 13,979                                               | 13,839        | 16,535                               | 16,553       | 4,783                                                  | 4,862        | 1,027                                                     | 1,031        | 43,345                                                       | 43,335        |
| 45-54                        | 56,129                                               | 55,811        | 43,493                               | 43,710       | 19,489                                                 | 19,594       | 3,298                                                     | 3,301        | 111,981                                                      | 111,933       |
| 55-64                        | 77,992                                               | 77,395        | 67,863                               | 68,497       | 38,032                                                 | 38,065       | 6,159                                                     | 6,133        | 190,845                                                      | 190,629       |
| 65-74                        | 75,804                                               | 75,689        | 79,450                               | 79,239       | 45,700                                                 | 46,096       | 9,350                                                     | 9,265        | 231,327                                                      | 231,231       |
| 75-84                        | 62,982                                               | 63,063        | 76,205                               | 76,436       | 64,610                                                 | 65,097       | 16,215                                                    | 16,240       | 312,778                                                      | 312,873       |
| 85-94                        | 37,568                                               | 37,483        | 38,943                               | 39,247       | 64,071                                                 | 63,958       | 15,318                                                    | 14,742       | 264,705                                                      | 263,235       |
| Females                      |                                                      |               |                                      |              |                                                        |              |                                                           |              |                                                              |               |
| 35-44                        | 6,259                                                | 6,144         | 6,390                                | 6,387        | 1,710                                                  | 1,822        | 873                                                       | 875          | 26,538                                                       | 26,619        |
| 45-54                        | 17,071                                               | 17,035        | 36,952                               | 37,083       | 6,858                                                  | 6,969        | 2,609                                                     | 2,764        | 71,145                                                       | 71,352        |
| 55-64                        | 40,246                                               | 40,403        | 42,966                               | 43,222       | 15,122                                                 | 15,265       | 4,622                                                     | 4,605        | 122,502                                                      | 122,546       |
| 65-74                        | 43,843                                               | 43,898        | 69,473                               | 69,659       | 24,964                                                 | 25,137       | 8,504                                                     | 8,308        | 178,530                                                      | 178,342       |
| 75-84                        | 60,097                                               | 60,043        | 93,040                               | 93,434       | 53,247                                                 | 53,600       | 21,492                                                    | 21,541       | 313,803                                                      | 313,894       |
| 85-94                        | 57,661                                               | 57,403        | 77,481                               | 77,883       | 99,680                                                 | 98,988       | 35,416                                                    | 36,233       | 448,864                                                      | 447,244       |
| <b>Deviation from target</b> |                                                      | <b>-0.26%</b> |                                      | <b>0.39%</b> |                                                        | <b>0.27%</b> |                                                           | <b>0.12%</b> |                                                              | <b>-0.14%</b> |

**Appendix Table S2. Results of the systolic blood pressure calibration exercise. FHS = Framingham Heart Study. PCS= Prospective Cohort Studies Collaboration. CVDPM = CVD Policy Model inputs and simulation outputs.**

|                  |                            | Beta coefficients (per 1.0 mm Hg systolic BP) |            |               |             |            |               | Relative risks (after 10 mm Hg SBP lowering or 5 mm Hg diastolic BP lowering) |            |                |             |            |                |
|------------------|----------------------------|-----------------------------------------------|------------|---------------|-------------|------------|---------------|-------------------------------------------------------------------------------|------------|----------------|-------------|------------|----------------|
|                  |                            | CHD                                           |            |               | Stroke      |            |               | CHD                                                                           |            |                | Stroke      |            |                |
| Age/sex category | Mean change in SBP (mm Hg) | FHS default                                   | PCS target | CVDPM (input) | FHS default | PCS target | CVDPM (input) | FHS default                                                                   | PCS target | CVDPM (output) | FHS default | PCS target | CVDPM (output) |
| Males            |                            |                                               |            |               |             |            |               |                                                                               |            |                |             |            |                |
| 35-44            | 9.57                       | .0217                                         | .0361      | .0325         | .0215       | .0513      | .0500         | .78                                                                           | .71        | .73            | .73         | .61        | .60            |
| 45-54            | 10.38                      | .0176                                         | .0353      | .0310         | .0196       | .0496      | .0460         | .81                                                                           | .70        | .72            | .75         | .61        | .59            |
| 55-64            | 10.38                      | .0135                                         | .0330      | .0300         | .0178       | .0453      | .0420         | .78                                                                           | .71        | .73            | .76         | .63        | .62            |
| 65-74            | 10.88                      | .0094                                         | .0285      | .0265         | .0159       | .0385      | .0370         | .75                                                                           | .74        | .76            | .76         | .66        | .66            |
| Females          |                            |                                               |            |               |             |            |               |                                                                               |            |                |             |            |                |
| 35-44            | 9.87                       | .0217                                         | .0360      | .0320         | .0215       | .0513      | .0470         | .71                                                                           | .70        | .72            | .79         | .60        | .60            |
| 45-54            | 10.35                      | .0176                                         | .0353      | .0320         | .0196       | .0496      | .0450         | .72                                                                           | .70        | .72            | .77         | .61        | .60            |
| 55-64            | 10.94                      | .0135                                         | .0330      | .0295         | .0178       | .0452      | .0414         | .73                                                                           | .70        | .72            | .73         | .62        | .61            |
| 65-74            | 11.68                      | .0094                                         | .0285      | .0245         | .0159       | .0385      | .0345         | .73                                                                           | .73        | .75            | .77         | .65        | .65            |

**Appendix Table S3. Comparison of CVD Policy Model trial simulation to Law Morris Wald meta-analysis of anti-hypertensive medication treatment trials, both assuming a systolic blood pressure change of 10 mm Hg or a diastolic blood pressure change of 5 mm Hg.**

| Outcome                | Law, Morris, and Wald meta-analysis estimate | CVD Policy Model main estimate Males             | CVD Policy Model main estimate Females           |
|------------------------|----------------------------------------------|--------------------------------------------------|--------------------------------------------------|
| Coronary heart disease | 0.78 (0.73—0.83)                             | Ages 35-74 years: 0.75<br>Ages 35-64 years: 0.74 | Ages 35-74 years: 0.74<br>Ages 35-64 years: 0.73 |
| Stroke                 | 0.59 (0.52—0.67)                             | Ages 35-74 years: 0.64<br>Ages 35-64 years: 0.62 | Ages 35-74 years: 0.63<br>Ages 35-64 years: 0.62 |

**Appendix Table S4. Results of a simulated trial of blood pressure treatment in participants in the Systolic Hypertension in the Elderly Program (SHEP) trial, using relative risk inputs and transition probabilities in the CVD Policy Model version used for the analysis.**

| SHEP Population RR (SBP lowering of 12 mmHg for 5 years) |                                 |                                                                                                                              |
|----------------------------------------------------------|---------------------------------|------------------------------------------------------------------------------------------------------------------------------|
| Outcome                                                  | Actual SHEP paper RR and 95% CI | CVD Policy Model five year simulation results with PSC calibrated SBP betas [overall rate ratio (95% uncertainty interval)*] |
| Incident stroke                                          | 0.64 (0.50-0.82)                | 0.70 (0.66-0.75)                                                                                                             |
| Incident coronary heart disease <sup>†</sup>             | 0.75 (0.60-0.94)                | 0.76 (0.73-0.79)                                                                                                             |

\*95% uncertainty intervals derived from 1,000 probabilistic simulations that sampled from within the 95% confidence intervals of age- and sex-specific Prospective Cohorts Studies Collaboration beta coefficients.

<sup>†</sup>SHEP incident coronary heart disease defined as first-in-trial nonfatal acute myocardial infarction, coronary revascularization, or coronary heart disease death. CVD Policy Model incident coronary heart disease defined as first-ever nonfatal acute myocardial infarction, angina pectoris with or without coronary revascularization, or coronary heart disease death.

**Appendix Table S5. Sequential changes in blood pressure with successive standard dose medications, based on the trials-based blood pressure change prediction formulas of Law, Morris, and Wald.<sup>19</sup>** For one standard-dose medication, the formula for calculating the change in systolic blood pressure was  $[9.1+0.10 \times (BS-154)]$ , and the formula for calculating the change in diastolic blood pressure was  $[5.1+0.11 \times (BD-97)]$ , in which BS denotes the baseline systolic blood pressure and BD the baseline diastolic blood pressure. The formula for one half-standard dose was  $[6.7+0.078 \times (BS-150)]$  for systolic and  $[3.7+0.088 \times (BD-90)]$  for diastolic.

|                                                 | Mean<br>start<br>BP | BP<br>change<br>1 drug | new<br>BP | BP<br>change<br>2nd drug | new<br>BP | BP<br>change<br>3rd drug | new<br>BP | BP<br>change<br>4th drug | new<br>BP | Final BP change |                          |                       |
|-------------------------------------------------|---------------------|------------------------|-----------|--------------------------|-----------|--------------------------|-----------|--------------------------|-----------|-----------------|--------------------------|-----------------------|
| <b>Systolic blood pressure (mm Hg changes)</b>  |                     |                        |           |                          |           |                          |           |                          |           |                 | <b>&lt; 60 years old</b> | <b>≥ 60 years old</b> |
| effect of 4 std dose                            | 185                 | 12.2                   | 172.8     | 11.0                     | 161.8     | 9.9                      | 151.9     | 8.9                      | 143.0     | 42.0            | 33.1                     |                       |
| effect of 3.5 std doses                         | 175                 | 11.2                   | 163.8     | 10.1                     | 153.7     | 9.1                      | 144.6     | 6.3                      | 138.4     | 36.6            | 21.3                     |                       |
|                                                 | 179                 | 11.6                   | 167.4     | 10.4                     | 157.0     | 9.4                      | 147.6     | 6.5                      | 141.1     |                 |                          |                       |
| effect of 3 std doses                           | 165                 | 10.2                   | 154.8     | 9.2                      | 145.6     | 8.3                      | 137.4     |                          |           | 27.6            | 19.4                     |                       |
|                                                 | 169                 | 10.6                   | 158.4     | 9.5                      | 148.9     | 8.6                      | 140.3     |                          |           |                 |                          |                       |
| effect of 2 std doses                           | 155                 | 9.2                    | 145.8     | 8.3                      | 137.5     |                          |           |                          |           | 17.5            |                          |                       |
| effect of 1 std dose                            | 155                 | 9.2                    | 145.8     |                          |           |                          |           |                          |           | 9.2             |                          |                       |
| effect of 1 std dose                            | 147                 | 8.4                    | 138.6     |                          |           |                          |           |                          |           | 8.4             |                          |                       |
| effect of 0.5 std dose                          | 142                 | 6.1                    | 135.9     |                          |           |                          |           |                          |           | 6.1             |                          |                       |
| effect of 0.5 std dose                          | 155                 | 7.1                    | 147.9     |                          |           |                          |           |                          |           |                 | 7.1                      |                       |
| <b>Diastolic blood pressure (mm Hg changes)</b> |                     |                        |           |                          |           |                          |           |                          |           |                 | <b>All ages</b>          |                       |
| effect of 3 std doses                           | 107                 | 6.6                    | 100.5     | 5.9                      | 94.6      | 5.2                      | 89.4      |                          |           | 17.7            |                          |                       |
| effect of 3 std doses                           | 104                 | 6.3                    | 97.7      | 5.6                      | 92.1      | 5.0                      | 87.2      |                          |           | 16.8            |                          |                       |
| effect of 3 std doses                           | 105                 | 6.3                    | 98.2      | 5.6                      | 92.5      | 5.0                      | 87.5      |                          |           | 17.0            |                          |                       |
| effect of 3 std doses                           | 105                 | 6.4                    | 98.6      | 5.7                      | 92.9      | 5.1                      | 87.9      |                          |           | 17.1            |                          |                       |
| effect of 3 std doses                           | 103                 | 6.2                    | 97.2      | 5.5                      | 91.7      | 4.9                      | 86.8      |                          |           | 16.6            |                          |                       |
| effect of 3 std doses                           | 107                 | 6.6                    | 100.5     | 5.9                      | 94.6      | 5.2                      | 89.4      |                          |           | 17.7            |                          |                       |
| effect one std dose                             | 94                  | 5.2                    | 89.0      |                          |           |                          |           |                          |           | 5.2             |                          |                       |
| effect one std dose                             | 94                  | 5.2                    | 88.8      |                          |           |                          |           |                          |           | 5.2             |                          |                       |
| effect one std dose                             | 93                  | 5.1                    | 88.0      |                          |           |                          |           |                          |           | 5.1             |                          |                       |
| effect of 0.5 std dose                          | 94                  | 4.1                    | 90.1      |                          |           |                          |           |                          |           | 4.1             |                          |                       |
| effect of 0.5 std dose                          | 94                  | 4.1                    | 89.9      |                          |           |                          |           |                          |           | 4.1             |                          |                       |

**Appendix Table S6. Costs, medication-related adverse event incidence, quality of life, adherence, and discount rate assumptions used for the comparative effectiveness analysis of U.S. BP treatment guidelines**

| <b>Annual costs per person treated (2010 costs; inflated to 2014 costs in all results)</b> |          |             |             |                                                                                                                                                                                   |
|--------------------------------------------------------------------------------------------|----------|-------------|-------------|-----------------------------------------------------------------------------------------------------------------------------------------------------------------------------------|
| <b>MD office visit</b>                                                                     |          |             |             |                                                                                                                                                                                   |
| Treatment monitoring visits (number)                                                       | 4        | 3           | 5           | ALLHAT trial (Heidenreich et al. <sup>53</sup> ), JNC7 recommendation. Outpatient visit, Medicare Physician Fee Schedule (code 99213, non-facility limiting charge) <sup>54</sup> |
| Stage 2 hypertension                                                                       | 3        | 2           | 4           |                                                                                                                                                                                   |
| Stage 1 hypertension                                                                       | \$71     | Not modeled | Not modeled |                                                                                                                                                                                   |
| Cost per routine monitoring visit                                                          |          |             |             |                                                                                                                                                                                   |
| <b>Hospitalization</b>                                                                     |          |             |             |                                                                                                                                                                                   |
| Average cost (used for infrequent hospitalized drug-related adverse events)                | \$12,000 | Not modeled | Not modeled | National Inpatient Sample survey                                                                                                                                                  |
| High cost (used for rare hospitalized drug-related adverse events)                         | \$21,000 |             |             |                                                                                                                                                                                   |
| <b>Laboratory test (electrolytes monitoring on treatment)</b>                              |          |             |             |                                                                                                                                                                                   |
| Number of tests                                                                            | 1        | 1           | 2           | JNC7 recommendation Centers for Medicare and Medicaid laboratory fee schedule <sup>55</sup>                                                                                       |
| Cost per test                                                                              | \$15     | Not modeled | Not modeled |                                                                                                                                                                                   |
| <b>Antihypertensive drug costs (total daily doses)***</b>                                  |          |             |             |                                                                                                                                                                                   |
| 0.5 standard doses                                                                         | \$124    | Not modeled | \$296       | Average wholesale prices reported by manufacturers ("Red Book"; 2010), <sup>56</sup> see Methods text for estimation method                                                       |
| 1.0 standard dose                                                                          | \$166    |             | \$363       |                                                                                                                                                                                   |
| 1.5 standard doses                                                                         | \$215    | \$409       |             |                                                                                                                                                                                   |
| 2.0 standard doses                                                                         | \$238    | \$567       |             |                                                                                                                                                                                   |
| 3.0 standard doses                                                                         | \$357    | \$850       |             |                                                                                                                                                                                   |
| 3.5 standard doses                                                                         | \$430    | \$1,311     |             |                                                                                                                                                                                   |
| 4.0 standard doses                                                                         | \$496    | \$1,374     |             |                                                                                                                                                                                   |
| Pharmacy dispensing fees                                                                   | \$27     |             | \$33        |                                                                                                                                                                                   |



|                                              |                   |     |                                                                                                          |
|----------------------------------------------|-------------------|-----|----------------------------------------------------------------------------------------------------------|
| <b>Acute and chronic CVD treatment costs</b> |                   |     |                                                                                                          |
| Myocardial infarction hospitalization        |                   |     | California Office of Statewide Health Planning and Development (OSHPD) hospital data, 2008 <sup>57</sup> |
| Nonfatal                                     | \$33,000          |     |                                                                                                          |
| Fatal                                        | \$46,000          |     |                                                                                                          |
| Coronary revascularization procedures        |                   |     |                                                                                                          |
| Percutaneous coronary intervention           | \$21,000-\$23,000 |     |                                                                                                          |
| Coronary artery bypass graft surgery         | \$57,000-\$59,000 |     |                                                                                                          |
| Stroke                                       |                   |     |                                                                                                          |
| Fatal                                        | \$21,000-\$26,000 |     |                                                                                                          |
| Nonfatal                                     | \$15,000-\$21,000 |     |                                                                                                          |
| Chronic coronary heart disease costs         |                   |     |                                                                                                          |
| First year                                   | \$11,000          |     |                                                                                                          |
| Subsequent years                             | \$2,000           |     |                                                                                                          |
| Chronic post-stroke costs                    |                   |     |                                                                                                          |
| First year                                   | \$16,000          |     |                                                                                                          |
| Subsequent years                             | \$5,000           |     |                                                                                                          |
| Inflation from 2010 to 2014 costs            | 9%                | 11% | Main = change in general U.S. consumer price index; upper = change in medical component                  |

|                                                                                        |           |          |           |                                                   |
|----------------------------------------------------------------------------------------|-----------|----------|-----------|---------------------------------------------------|
| <b>Serious adverse effects of medications<br/>(incidence per 100,000 person-years)</b> |           |          |           |                                                   |
| Common, outpatient management                                                          |           |          |           | Based on Law 2003 <sup>59</sup>                   |
| three standard doses                                                                   | 10,039.20 | 6,950.21 | 12,742.06 |                                                   |
| two standard doses                                                                     | 7,572.41  | 5,242.43 | 9,611.13  |                                                   |
| one standard dose                                                                      | 5,200.00  | 3,600.06 | 6,600.00  |                                                   |
| one-half standard dose                                                                 | 2,600.00  | 1,800.00 | 3,300.00  |                                                   |
| Infrequent, hospitalized                                                               |           |          |           | trials, medication labels, post-marketing reports |
| three standard doses                                                                   | 193.06    | 19.31    | 965.31    |                                                   |
| two standard doses                                                                     | 145.62    | 14.56    | 728.12    |                                                   |
| one standard dose                                                                      | 100.00    | 10.00    | 500.00    |                                                   |
| one-half standard dose                                                                 | 50.00     | 5.00     | 250.00    |                                                   |
| Rare, hospitalized/severe                                                              |           |          |           |                                                   |
| three standard doses                                                                   | 1.93      | 0.0193   | 19.31     |                                                   |
| two standard doses                                                                     | 1.46      | 0.0146   | 14.56     |                                                   |

|                                                                                       |            |                                          |             |                                                                    |
|---------------------------------------------------------------------------------------|------------|------------------------------------------|-------------|--------------------------------------------------------------------|
| one standard dose                                                                     | 1.00       | 0.0100                                   | 10.00       |                                                                    |
| one-half standard dose                                                                | 0.50       | 0.0050                                   | 5.00        |                                                                    |
| <b>Death</b>                                                                          |            |                                          |             |                                                                    |
| three standard doses                                                                  | 0.0193     | 0.0002                                   | 0.1931      |                                                                    |
| two standard doses                                                                    | 0.0146     | 0.0001                                   | 0.1456      |                                                                    |
| one standard dose                                                                     | 0.0100     | 0.0001                                   | 0.1000      |                                                                    |
| one-half standard dose                                                                | 0.0050     | 0.0001                                   | 0.0500      |                                                                    |
| <b>Utility (QALY weight penalty, duration)</b>                                        |            |                                          |             |                                                                    |
| Drug side effects managed as outpatient (1 d)                                         | 0.23       |                                          |             | Montgomery <sup>60</sup>                                           |
| Drug side effect requiring hospitalization (1d)                                       | 0.50       |                                          |             | Clinical judgment                                                  |
| Acute stroke (1 m)                                                                    | 0.86       |                                          |             | GBD 2010 Study <sup>61</sup>                                       |
| Chronic stroke survivors (12 m)                                                       | 0.85--0.88 |                                          |             |                                                                    |
| Acute myocardial Infarction (1 m)                                                     | 0.91       |                                          |             |                                                                    |
| Acute unstable angina (1 m)                                                           | 0.95       |                                          |             |                                                                    |
| Chronic CHD (12 m)                                                                    | 0.91—0.98  |                                          |             |                                                                    |
| Death                                                                                 | 1.00       |                                          |             |                                                                    |
| Disutility due to taking daily medications                                            | 0.00       |                                          | 0.01-- 0.02 | Past cost-effectiveness analyses <sup>54, 55, 62</sup>             |
| <b>Adherence to medications (percent of patients continuing prescribed treatment)</b> | 75%        | 25% or 50% lower than observed in trials | Not modeled | Law, Morris and Wald meta-analysis for main estimate <sup>19</sup> |
| <b>Annual discount rate</b>                                                           | 3%         | Not modeled                              | Not modeled | Assumed                                                            |

**Appendix Table S7. Annual population treated and cost-effectiveness of implementing JNC 8 hypertension treatment guidelines in all previously untreated adults with hypertension aged 35-74 years, the CVD Policy Model. Average annual results from a years 2014-2024 simulation.**

| <b>Males</b>                                                      |                             |                   |                   |                              |                                |             |                             |                   |                   |                              |                                |             |
|-------------------------------------------------------------------|-----------------------------|-------------------|-------------------|------------------------------|--------------------------------|-------------|-----------------------------|-------------------|-------------------|------------------------------|--------------------------------|-------------|
|                                                                   | <u>Ages 35-59 years</u>     |                   |                   |                              |                                |             | <u>Ages 60-74 years</u>     |                   |                   |                              |                                |             |
| <b>Strategy</b>                                                   | <b>Number newly treated</b> | <b>CVD events</b> | <b>CVD deaths</b> | <b>CVD costs (thousands)</b> | <b>Total QALYs (thousands)</b> | <b>ICER</b> | <b>Number newly treated</b> | <b>CVD events</b> | <b>CVD deaths</b> | <b>CVD costs (thousands)</b> | <b>Total QALYs (thousands)</b> | <b>ICER</b> |
| Status quo                                                        |                             | 195,000           | 49,100            | 32,548,707                   | 44,162                         |             |                             | 292,000           | 96,500            | 46,204,464                   | 20,924                         |             |
| Base case: treat CVD patients to 140/90, compared with status quo | 251,000                     | 193,000           | 48,300            | 32,389,198                   | 44,164                         | Cost-saving | 454,000                     | 284,000           | 93,500            | 45,608,476                   | 20,932                         | Cost-saving |
| Stage one, primary prevention (compared with base case)           | 2,394,000                   | 179,000           | 46,200            | 31,922,497                   | 44,187                         | Cost-saving | 1,353,000                   | 271,000           | 90,700            | 45,005,183                   | 20,954                         | Cost-saving |
| <b>Females</b>                                                    |                             |                   |                   |                              |                                |             |                             |                   |                   |                              |                                |             |
|                                                                   | <u>Ages 35-59 years</u>     |                   |                   |                              |                                |             | <u>Ages 60-74 years</u>     |                   |                   |                              |                                |             |
| <b>Strategy</b>                                                   | <b>Number newly treated</b> | <b>CVD events</b> | <b>CVD deaths</b> | <b>CVD costs (thousands)</b> | <b>Total QALYs (thousands)</b> | <b>ICER</b> | <b>Number newly treated</b> | <b>CVD events</b> | <b>CVD deaths</b> | <b>CVD costs (thousands)</b> | <b>Total QALYs (thousands)</b> | <b>ICER</b> |
| Status quo                                                        |                             | 101,000           | 20,600            | 20,256,506                   | 44,995                         |             |                             | 204,000           | 56,400            | 30,970,745                   | 23,201                         |             |
| Base case: treat CVD patients to 140/90, compared with status quo | 133,000                     | 100,000           | 20,400            | 20,233,485                   | 44,996                         | Cost-saving | 29,000                      | 199,000           | 54,600            | 30,708,052                   | 23,206                         | Cost-saving |
| Stage one, primary prevention (compared with base case)           | 1,584,000                   | 97,000            | 20,000            | 20,334,623                   | 45,002                         | 17,700      | 503,000                     | 188,000           | 52,600            | 30,498,158                   | 23,221                         | Cost-saving |

**Appendix Table S8. Average annual population treated and cost-effectiveness of implementing U.S. hypertension treatment guidelines in all previously untreated adults aged 35-74 years with stage 2 hypertension (DBP >= 100 mm Hg if age 35-59 years; BP >= 160/100 mm Hg if age >=60 years), the CVD Policy Model.**

| Strategy                                             | Males                |            |            |                         |                         |             | ICER                 | Females              |            |                         |                         |                         |
|------------------------------------------------------|----------------------|------------|------------|-------------------------|-------------------------|-------------|----------------------|----------------------|------------|-------------------------|-------------------------|-------------------------|
|                                                      | Ages 35-59 years     |            |            | Ages 60-74 years        |                         |             |                      | Ages 35-59 years     |            |                         | Ages 60-74 years        |                         |
|                                                      | Number newly treated | CVD events | CVD deaths | Total costs (thousands) | Total QALYs (thousands) |             |                      | Number newly treated | CVD events | CVD deaths              | Total costs (thousands) | Total QALYs (thousands) |
| Status quo                                           |                      | 195,000    | 49,100     | 32,548,707              | 44,162                  |             |                      | 292,000              | 96,500     | 46,204,464              | 20,924                  |                         |
| Base case: treat CVD patients to 140/90              | 251,000              | 193,000    | 48,300     | 32,389,198              | 44,164                  | Cost-saving | 454,000              | 284,000              | 93,500     | 45,608,476              | 20,932                  | Cost-saving             |
| Stage 2, primary prevention, compared with base case | 838,000              | 184,000    | 47,100     | 31,910,683              | 44,177                  | Cost-saving | 1,110,000            | 277,000              | 91,900     | 45,202,418              | 20,944                  | Cost-saving             |
|                                                      | Males                |            |            |                         |                         |             |                      | Females              |            |                         |                         |                         |
|                                                      | Ages 35-59 years     |            |            | Ages 60-74 years        |                         |             |                      | Ages 35-59 years     |            |                         | Ages 60-74 years        |                         |
|                                                      | Number newly treated | CVD events | CVD deaths | Total costs (thousands) | Total QALYs (thousands) |             | Number newly treated | CVD events           | CVD deaths | Total costs (thousands) | Total QALYs (thousands) | ICER                    |
| Status quo                                           |                      | 101,000    | 20,600     | 20,256,506              | 44,995                  |             |                      | 204,000              | 56,400     | 30,970,745              | 23,201                  |                         |
| Base case: treat CVD patients to 140/90              | 133,000              | 100,000    | 20,400     | 20,233,485              | 44,996                  | Cost-saving | 316,000              | 199,000              | 54,600     | 30,708,052              | 23,206                  | Cost-saving             |
| Stage 2, primary prevention, compared with base case | 283,000              | 99,000     | 20,300     | 20,203,812              | 44,998                  | Cost-saving | 849,000              | 191,000              | 53,200     | 30,471,357              | 23,216                  | Cost-saving             |

**Appendix Table S9. Average annual population treated and cost-effectiveness of implementing U.S. hypertension treatment guidelines in all previously untreated males and females aged 35-59 years with stage 1 hypertension (BP >= 90-99 mm Hg or 140-159 mm Hg) and with diabetes or chronic kidney disease, the CVD Policy Model.**

| Strategy                                                | Males                |            |            |                       |                         |                  |                      |            |            |                       |                         |             |                      |            |            |                       |                         |             |
|---------------------------------------------------------|----------------------|------------|------------|-----------------------|-------------------------|------------------|----------------------|------------|------------|-----------------------|-------------------------|-------------|----------------------|------------|------------|-----------------------|-------------------------|-------------|
|                                                         | Ages 35-44 years     |            |            |                       |                         | Ages 45-59 years |                      |            |            |                       | Ages 60-74 years        |             |                      |            |            |                       |                         |             |
|                                                         | Number newly treated | CVD events | CVD deaths | CVD costs (thousands) | Total QALYs (thousands) | ICER             | Number newly treated | CVD events | CVD deaths | CVD costs (thousands) | Total QALYs (thousands) | ICER        | Number newly treated | CVD events | CVD deaths | CVD costs (thousands) | Total QALYs (thousands) | ICER        |
| Status quo                                              |                      | 30,000     | 6,000      | 5,814,034             | 18,133                  |                  |                      | 165,000    | 43,200     | 26,734,672            | 26,030                  |             |                      | 292,000    | 96,500     | 46,204,464            | 20,924                  |             |
| Base case                                               | 60,000               | 30,000     | 5,800      | 5,802,734             | 18,133                  | Cost-saving      | 191,000              | 163,000    | 42,400     | 26,586,464            | 26,031                  | Cost-saving | 454,000              | 284,000    | 93,500     | 45,608,476            | 20,932                  | Cost-saving |
| Stage one, primary prevention (compared with base case) | 191,000              | 29,000     | 5,800      | 5,808,145             | 18,133                  | 13,100           | 478,000              | 156,000    | 42,200     | 26,558,006            | 26,033                  | Cost-saving | 980,000              | 281,000    | 92,800     | 45,482,721            | 20,937                  | Cost-saving |
| Strategy                                                | Females              |            |            |                       |                         |                  |                      |            |            |                       |                         |             |                      |            |            |                       |                         |             |
|                                                         | Ages 35-44 years     |            |            |                       |                         | Ages 45-59 years |                      |            |            |                       | Ages 60-74 years        |             |                      |            |            |                       |                         |             |
|                                                         | Number newly treated | CVD events | CVD deaths | CVD costs (thousands) | Total QALYs (thousands) | ICER             | Number newly treated | CVD events | CVD deaths | CVD costs (thousands) | Total QALYs (thousands) | ICER        | Number newly treated | CVD events | CVD deaths | CVD costs (thousands) | Total QALYs (thousands) | ICER        |
| Status quo                                              |                      | 11,000     | 2,500      | 3,495,301             | 17,964                  |                  |                      | 89,000     | 18,200     | 16,761,206            | 27,031                  |             |                      | 204,000    | 56,400     | 30,970,745            | 23,201                  |             |
| Base case                                               | 27,000               | 11,000     | 2,400      | 3,497,209             | 17,964                  | 79,800           | 112,000              | 89,000     | 18,000     | 16,736,276            | 27,032                  | Cost-saving | 351,000              | 199,000    | 54,600     | 30,708,052            | 23,206                  | Cost-saving |
| Stage one, primary prevention (compared with base case) | 110,000              | 12,000     | 2,400      | 3,509,906             | 17,964                  | 124,800          | 746,000              | 88,000     | 17,900     | 16,753,691            | 27,033                  | 16,300      | 635,000              | 197,000    | 54,200     | 30,717,887            | 23,208                  | 3,500       |

**Appendix Table S10. Average annual population treated and cost-effectiveness of implementing U.S. hypertension treatment guidelines in all previously untreated males and females aged 35-59 years with stage 1 hypertension (DBP 90-99 mm Hg or SBP 140-159 mm Hg) and without diabetes or chronic kidney disease, the CVD Policy Model.**

| Strategy                                                | Males                |            |            |                       |                         |             |           | ICER    | Females              |            |            |                       |                         |      |
|---------------------------------------------------------|----------------------|------------|------------|-----------------------|-------------------------|-------------|-----------|---------|----------------------|------------|------------|-----------------------|-------------------------|------|
|                                                         | Ages 35-44 years     |            |            |                       | Ages 45-59 years        |             |           |         | Ages 35-44 years     |            |            |                       | Ages 45-59 years        |      |
|                                                         | Number newly treated | CVD events | CVD deaths | CVD costs (thousands) | Total QALYs (thousands) |             |           |         | Number newly treated | CVD events | CVD deaths | CVD costs (thousands) | Total QALYs (thousands) | ICER |
| Status quo                                              |                      | 30,000     | 6,000      | 5,814,034             | 18,133                  |             |           | 165,000 | 43,200               | 26,734,672 | 26,030     |                       |                         |      |
| Base case                                               | 60,000               | 30,000     | 5,800      | 5,802,734             | 18,133                  | Cost-saving | 253,000   | 163,000 | 42,400               | 26,586,464 | 26,031     | Cost-saving           |                         |      |
| Stage one, primary prevention (compared with base case) | 793,000              | 30,000     | 5,700      | 5,872,551             | 18,135                  | 40,700      | 1,100,000 | 160,000 | 42,000               | 26,553,673 | 26,037     | Cost-saving           |                         |      |
| Strategy                                                | Males                |            |            |                       |                         |             |           | ICER    | Females              |            |            |                       |                         |      |
|                                                         | Ages 35-44 years     |            |            |                       | Ages 45-59 years        |             |           |         | Ages 35-44 years     |            |            |                       | Ages 45-59 years        |      |
|                                                         | Number newly treated | CVD events | CVD deaths | CVD costs (thousands) | Total QALYs (thousands) |             |           |         | Number newly treated | CVD events | CVD deaths | CVD costs (thousands) | Total QALYs (thousands) | ICER |
| Status quo                                              |                      | 11,000     | 2,500      | 3,495,301             | 17,964                  |             |           | 89,000  | 18,200               | 16,761,206 | 27,031     |                       |                         |      |
| Base case                                               | 21,000               | 11,000     | 2,400      | 3,497,209             | 17,964                  | 79,800      | 112,000   | 89,000  | 18,000               | 16,736,276 | 27,032     | Cost-saving           |                         |      |
| Stage one, primary prevention (compared with base case) | 262,000              | 11,000     | 2,400      | 3,547,326             | 17,964                  | 181,600     | 713,000   | 88,000  | 17,800               | 16,786,921 | 27,034     | 22,200                |                         |      |

**Appendix Table S11. Average annual population treated and cost-effectiveness of implementing U.S. hypertension treatment guidelines in all previously untreated males and females aged 60-74 years with stage 1 hypertension (BP  $\geq$  90-99 mm Hg or 140-159 mm Hg) and without diabetes or chronic kidney disease, the CVD Policy Model.**

| <b>Males</b>                                            |                      |            |            |                       |                         |             |
|---------------------------------------------------------|----------------------|------------|------------|-----------------------|-------------------------|-------------|
| <u>Ages 60-74 years</u>                                 |                      |            |            |                       |                         |             |
| Strategy                                                | Number newly treated | CVD events | CVD deaths | CVD costs (thousands) | Total QALYs (thousands) | ICER        |
| Status quo                                              |                      | 292,000    | 96,500     | 46,204,464            | 20,924                  |             |
| Base case                                               | 454,000              | 284,000    | 93,500     | 45,608,476            | 20,932                  | Cost-saving |
| Stage one, primary prevention (compared with base case) | 1,078,000            | 282,000    | 93,100     | 45,565,786            | 20,936                  | Cost-saving |
| <b>Females</b>                                          |                      |            |            |                       |                         |             |
| <u>Ages 60-74 years</u>                                 |                      |            |            |                       |                         |             |
| Strategy                                                | Number newly treated | CVD events | CVD deaths | CVD costs (thousands) | Total QALYs (thousands) | ICER        |
| Status quo                                              |                      | 204,000    | 56,400     | 30,970,745            | 23,201                  |             |
| Base case                                               | 351,000              | 199,000    | 54,600     | 30,708,052            | 23,206                  | Cost-saving |
| Stage one, primary prevention (compared with base case) | 678,000              | 198,000    | 54,400     | 30,743,749            | 23,207                  | 21,000      |

**Appendix Table S12. One-way sensitivity analyses. Data are ICERs compared with the base case. CS = cost-saving.**

| Sensitivity analysis                                                       | Males       |                 |                       |             |                 |                       | Females     |                 |                       |             |                 |                       |
|----------------------------------------------------------------------------|-------------|-----------------|-----------------------|-------------|-----------------|-----------------------|-------------|-----------------|-----------------------|-------------|-----------------|-----------------------|
|                                                                            | age 35-59   |                 |                       | ages 60-74  |                 |                       | age 35-59   |                 |                       | ages 60-74  |                 |                       |
|                                                                            | all stage 2 | stage 1, DM/CKD | stage 1, no DM or CKD | all stage 2 | stage 1, DM/CKD | stage 1, no DM or CKD | all stage 2 | stage 1, DM/CKD | stage 1, no DM or CKD | all stage 2 | stage 1, DM/CKD | stage 1, no DM or CKD |
| Results using main input assumptions                                       | cs          | cs              | 5,000                 | cs          | cs              | cs                    | cs          | 25,800          | 39,400                | cs          | 3,500           | 21,000                |
| Effectiveness                                                              |             |                 |                       |             |                 |                       |             |                 |                       |             |                 |                       |
| Blood pressure change with treatment                                       |             |                 |                       |             |                 |                       |             |                 |                       |             |                 |                       |
| <b>Higher</b>                                                              | cs          | cs              | cs                    | cs          | cs              | cs                    | cs          | 11,700          | 21,500                | cs          | cs              | 7,800                 |
| <b>Lower</b>                                                               | cs          | 6,300           | 27,500                | cs          | cs              | 3,500                 | cs          | 51,300          | 74,000                | cs          | 13,700          | 47,600                |
| Relative risk for CHD or stroke with change in BP                          |             |                 |                       |             |                 |                       |             |                 |                       |             |                 |                       |
| <b>Lower bound</b>                                                         | cs          | cs              | cs                    | cs          | cs              | cs                    | cs          | 14,900          | 21,700                | cs          | cs              | 12,800                |
| <b>Upper bound</b>                                                         | cs          | 1,100           | 21,900                | cs          | cs              | cs                    | 5,000       | 38,100          | 60,600                | cs          | 14,100          | 31,600                |
| Relative risk for non-CVD death                                            |             |                 |                       |             |                 |                       |             |                 |                       |             |                 |                       |
| <b>Lower bound</b>                                                         | cs          | cs              | 2,400                 | cs          | cs              | cs                    | cs          | 15,400          | 21,900                | cs          | 2,800           | 9,100                 |
| <b>Upper bound</b>                                                         | cs          | cs              | 4,600                 | cs          | cs              | cs                    | cs          | 50,500          | 74,100                | cs          | 25,300          | harmful*              |
| Adherence (incremental to adherence in treatment trials)                   |             |                 |                       |             |                 |                       |             |                 |                       |             |                 |                       |
| <b>50%</b>                                                                 | cs          | cs              | cs                    | cs          | cs              | cs                    | cs          | 19,100          | 30,500                | cs          | cs              | 18,800                |
| <b>75%</b>                                                                 | cs          | cs              | 1,800                 | cs          | cs              | cs                    | cs          | 22,700          | 35,200                | cs          | 1,200           | 20,500                |
| Costs                                                                      |             |                 |                       |             |                 |                       |             |                 |                       |             |                 |                       |
| Medication costs                                                           |             |                 |                       |             |                 |                       |             |                 |                       |             |                 |                       |
| <b>Higher</b>                                                              | cs          | 35,200          | 44,600                | cs          | 2,000           | 15,500                | 33,800      | 97,600          | 99,700                | 4,000       | 53,200          | 82,100                |
| Frequency of monitoring                                                    |             |                 |                       |             |                 |                       |             |                 |                       |             |                 |                       |
| <b>Higher</b>                                                              | cs          | 9,800           | 30,100                | cs          | cs              | 100                   | cs          | 56,900          | 77,300                | cs          | 25,000          | 40,700                |
| <b>Lower</b>                                                               | cs          | cs              | cs                    | cs          | cs              | cs                    | cs          | 11,900          | 22,800                | cs          | cs              | 15,700                |
| Add estimated non-cardiovascular disease cost savings                      | cs          | cs              | cs                    |
| Quality of life                                                            |             |                 |                       |             |                 |                       |             |                 |                       |             |                 |                       |
| <b>Higher side effect frequency</b>                                        | cs          | cs              | 15,700                | cs          | cs              | cs                    | cs          | 39,100          | 55,400                | cs          | 12,500          | 30,300                |
| <b>Lower side effect frequency</b>                                         | cs          | cs              | 400                   | cs          | cs              | cs                    | cs          | 20,000          | 32,300                | cs          | cs              | 16,600                |
| Pill-taking disutility                                                     |             |                 |                       |             |                 |                       |             |                 |                       |             |                 |                       |
| <b>Lower pill-taking disutility</b>                                        | cs          | lost QALYs†     | lost QALYs†           | cs          | cs              | lost QALYs†           | cs          | lost QALYs†     | lost QALYs†           | cs          | lost QALYs†     | lost QALYs†           |
| <b>Higher side effect frequency</b>                                        | cs          | lost QALYs†     | lost QALYs†           | 129,300     | lost QALYs†     | lost QALYs†           | lost QALYs† | lost QALYs†     | lost QALYs†           | lost QALYs† | lost QALYs†     | lost QALYs†           |
| Lag in medication effectiveness                                            |             |                 |                       |             |                 |                       |             |                 |                       |             |                 |                       |
| <b>One year lag in medication benefits; full costs</b>                     | cs          | cs              | 5,200                 | cs          | cs              | cs                    | cs          | 26,500          | 40,600                | cs          | 3,600           | 21,500                |
| Cost inflation calculation                                                 |             |                 |                       |             |                 |                       |             |                 |                       |             |                 |                       |
| <b>Calculate inflation using medical component of consumer price index</b> | cs          | cs              | 5,100                 | cs          | cs              | cs                    | cs          | 26,300          | 40,300                | cs          | 3,600           | 21,500                |

\*Under this assumption, the intervention would lead to a loss of QALYs compared with the base case

†Willingness to forego healthy life years gained in order avoid taking pills resulted in net loss of QALYs. Lower disutility assumption meant that on average patients would forego 30 days of healthy life gained over 10 years in order to avoid taking antihypertensive medications. High disutility meant patients would forego 60 days of healthy life gained over 10 years in order to avoid taking antihypertensive medications.



Appendix Figure S1. Cardiovascular Disease Policy Model structure and disease states.

### Cardiovascular Policy Model Structure

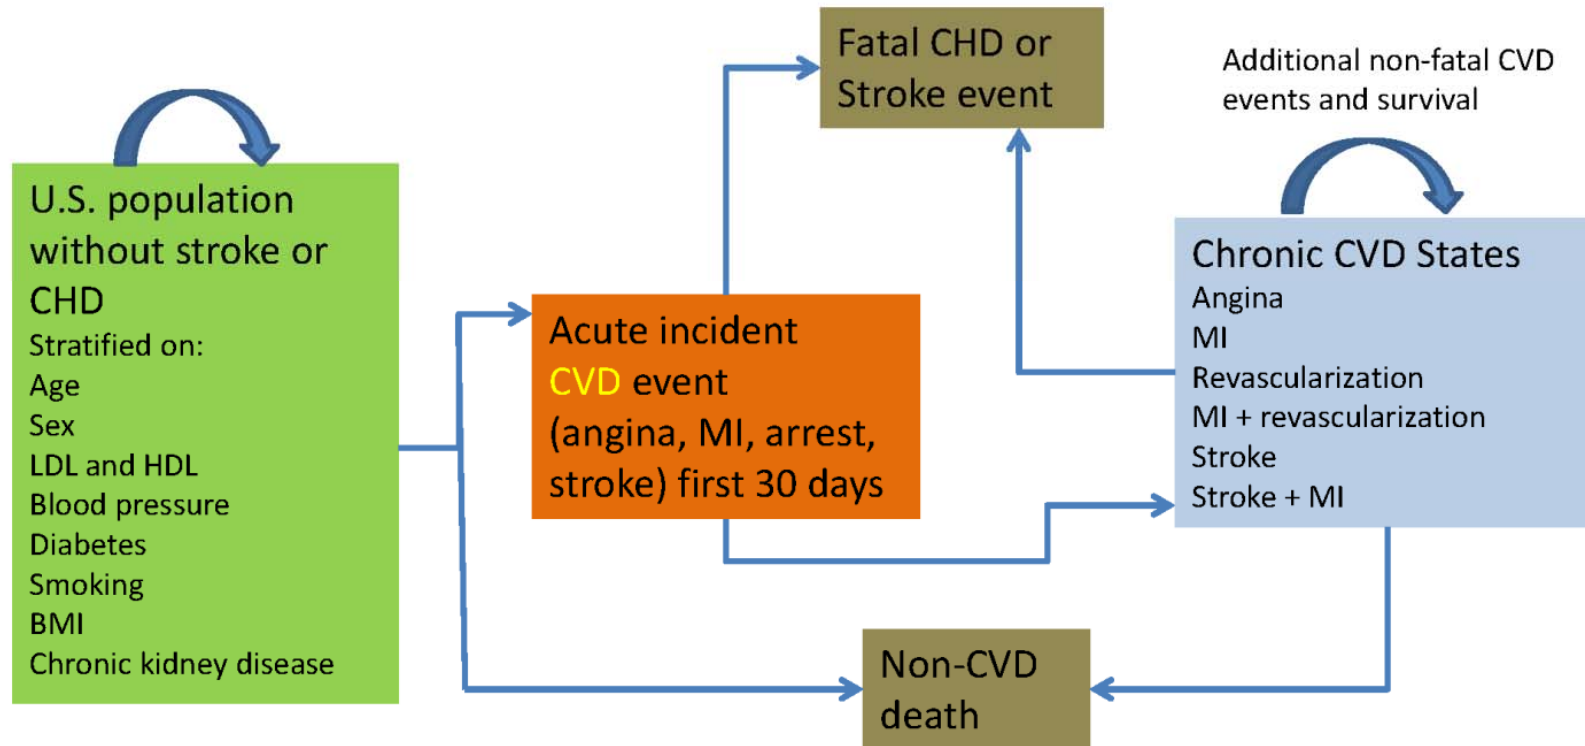

**Appendix Figure S2. Incremental costs and effectiveness of treating to the target blood pressure in men and women, according to age group and targeted treatment group. Successive strategies add additional interventions; each strategy is compared with a prior, more effective strategy within the same age category. Base case represents a strategy of treating hypertension in all CVD patients with untreated hypertension.**

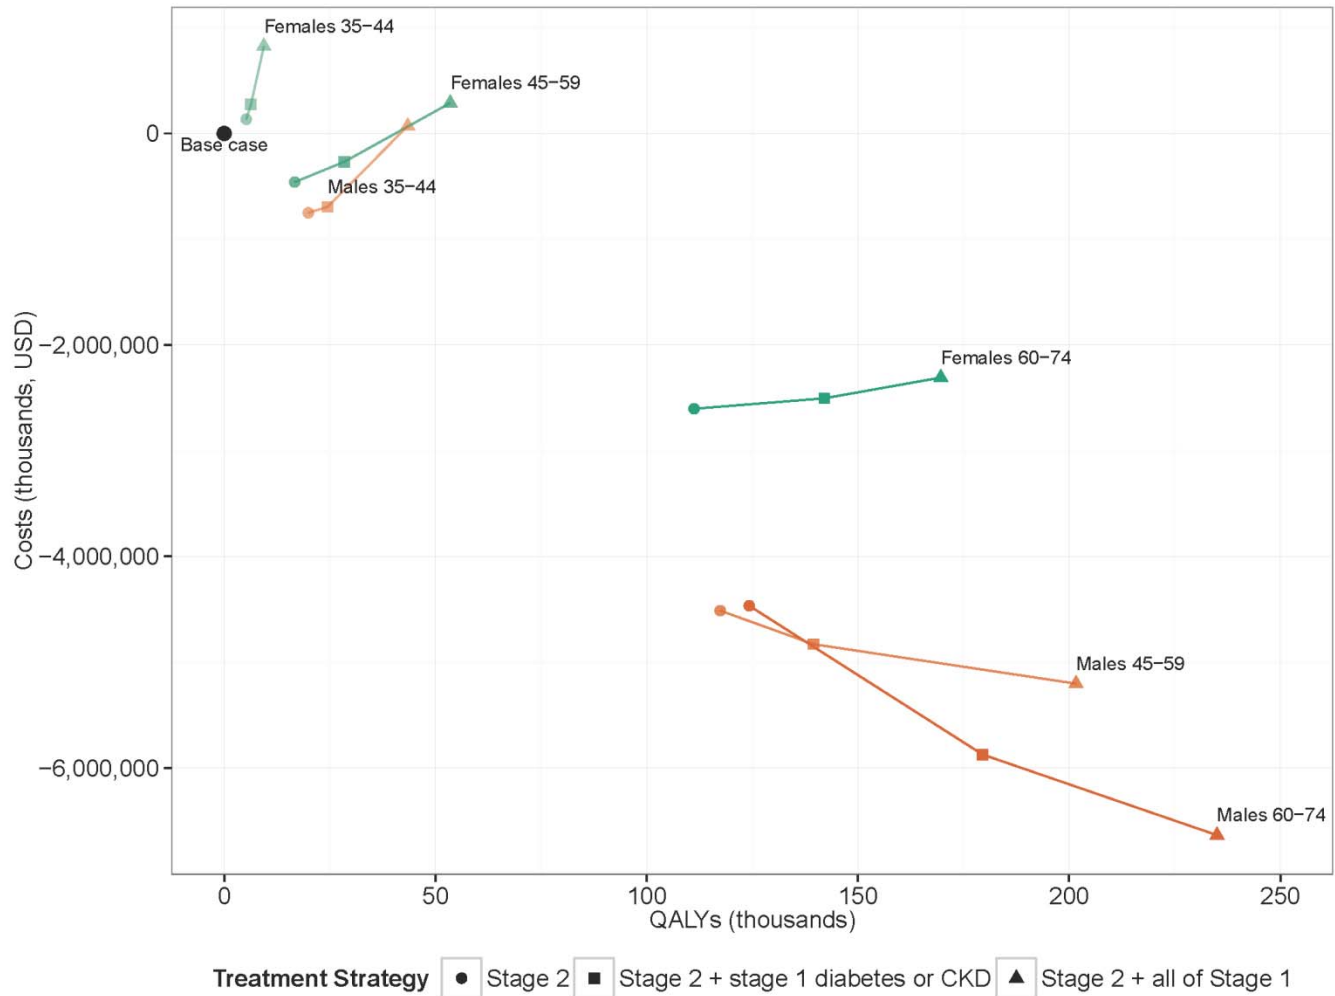

**Appendix Figure S3. Cost-effectiveness ratios and 95% intervals of results from the probabilistic (Monte Carlo) analysis, by age and major treatment group. All comparisons are with the base case of treating hypertension in all CVD patients with untreated hypertension. Note that all negative value incremental cost-effectiveness ratios are due to cost-savings divided by gained QALYs.**

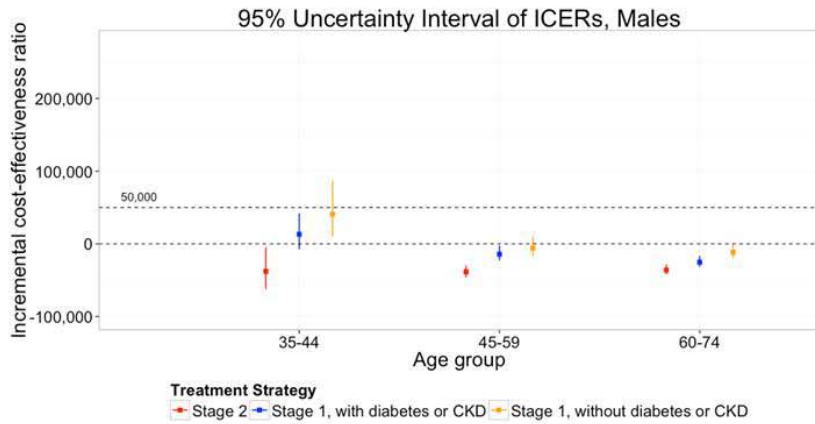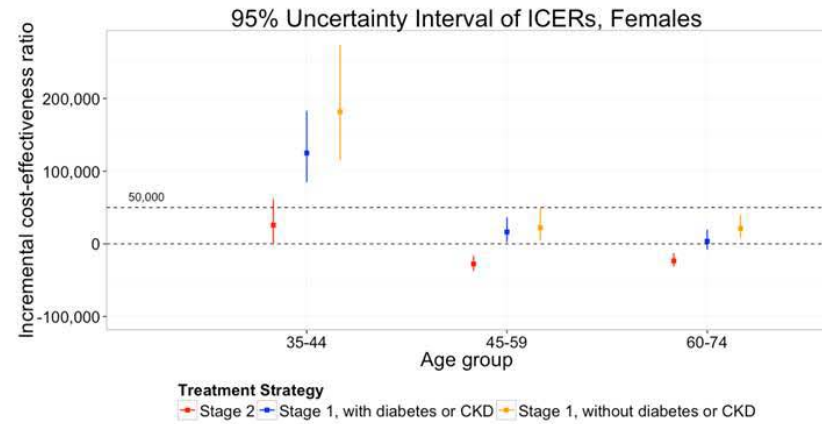

| Percentage of ICERs below a given threshold, males |         |        |           |         |        |           |         |        |           |
|----------------------------------------------------|---------|--------|-----------|---------|--------|-----------|---------|--------|-----------|
|                                                    | 35-44   |        |           | 45-59   |        |           | 60-74   |        |           |
|                                                    | Stage 2 | DM/CKD | No DM/CKD | Stage 2 | DM/CKD | No DM/CKD | Stage 2 | DM/CKD | No DM/CKD |
| <\$50,000                                          | 100.00  | 99.40  | 66.13     | 100.00  | 100.00 | 100.00    | 100.00  | 100.00 | 100.00    |
| cost-saving                                        | 98.40   | 13.99  | 0.30      | 100.00  | 98.90  | 77.32     | 99.80   | 100.00 | 97.60     |

| Percentage of ICERs below a given threshold, females |         |        |           |         |        |           |         |        |           |
|------------------------------------------------------|---------|--------|-----------|---------|--------|-----------|---------|--------|-----------|
|                                                      | 35-44   |        |           | 45-59   |        |           | 60-74   |        |           |
|                                                      | Stage 2 | DM/CKD | No DM/CKD | Stage 2 | DM/CKD | No DM/CKD | Stage 2 | DM/CKD | No DM/CKD |
| <\$50,000                                            | 92.21   | 0.00   | 0.00      | 100.00  | 100.00 | 98.00     | 100.00  | 100.00 | 99.90     |
| cost-saving                                          | 2.50    | 0.00   | 0.00      | 100.00  | 0.90   | 0.50      | 99.80   | 29.57  | 0.00      |

Panel A (Males) of Appendix Figure S3:

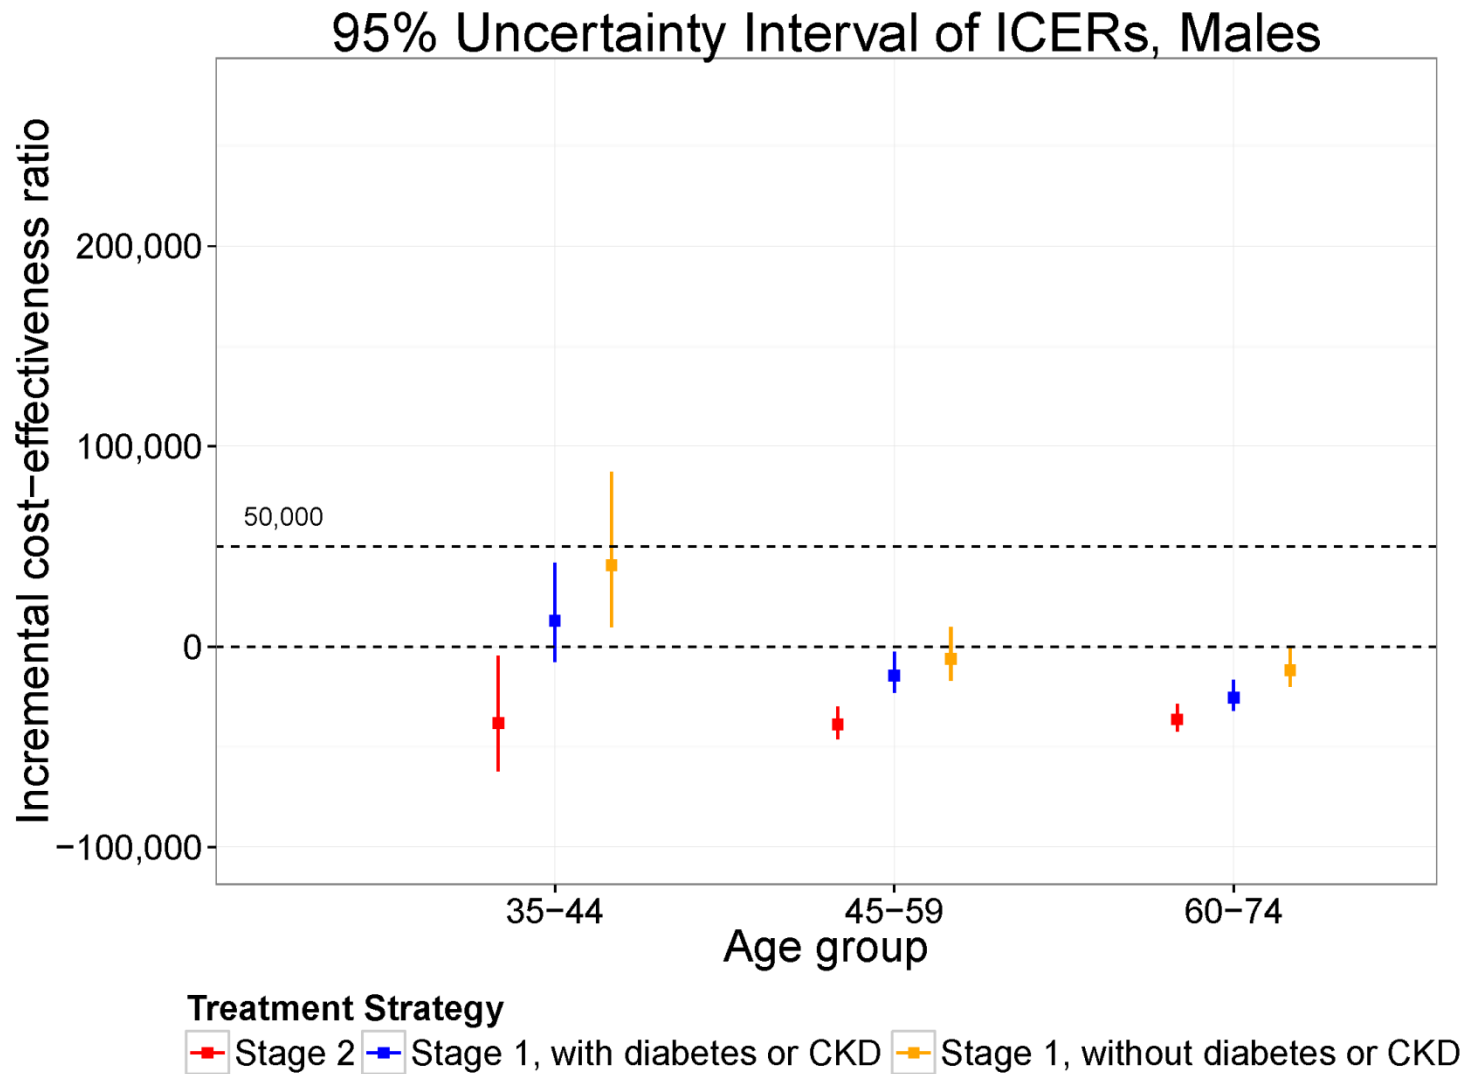

Panel B (Females) of Appendix Figure S3.

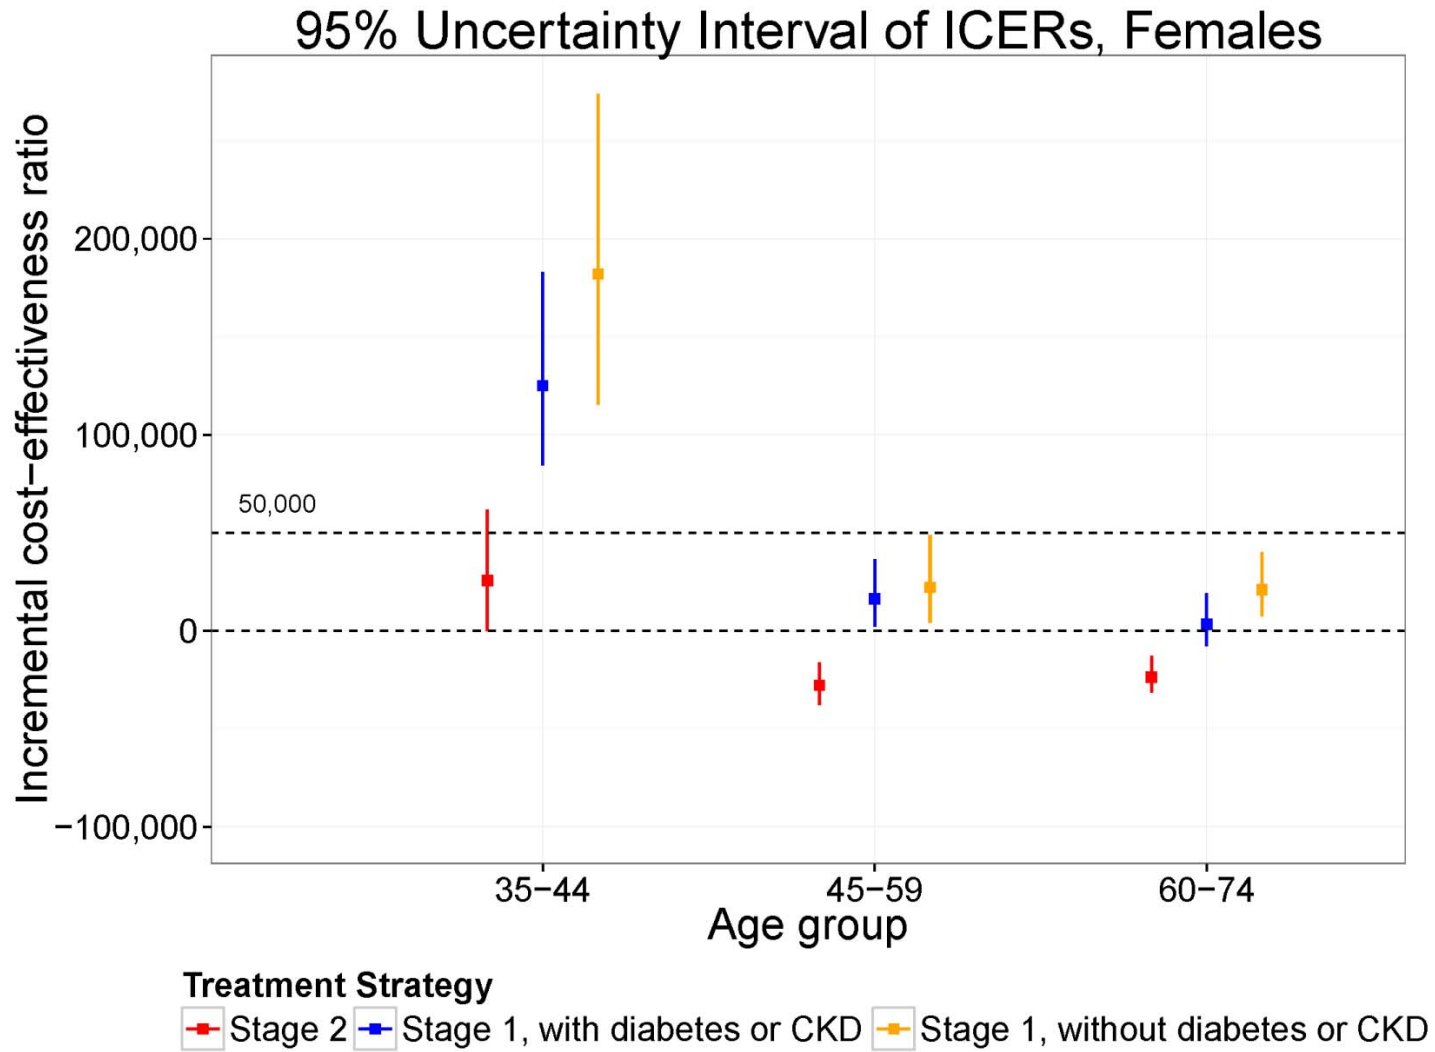

## Supplementary Materials References:

1. Bibbins-Domingo K, Coxson P, Pletcher MJ, Lightwood J, Goldman L. Adolescent overweight and future adult coronary heart disease. *The New England journal of medicine*. Dec 6 2007;357(23):2371-2379.
2. Hunink MGM, Goldman L, Tosteson ANA, Mittleman MA, Goldman PA, Williams LW, Tsevat J, Weinstein MC. The recent decline in mortality from coronary heart disease, 1980-1990: the effect of secular trends in risk factors and treatment. *JAMA : the journal of the American Medical Association*. 1997;277(7):535-542.
3. Weinstein MC, Coxson PG, Williams LW, Pass TM, Stason WB, Goldman L. Forecasting coronary heart disease incidence, mortality, and cost: the Coronary Heart Disease Policy Model. *Am J of Public Health*. 1987;77(11):1417-1426.
4. U.S. Census Bureau Population Division. Monthly Postcensal Resident Population by Single Year of Age, Sex, Race and Hispanic Origin for the United States: July 1, 2010 to December 1 2010 (NC-EST2011-ALLDATA-R-File02). 2011; <http://www.census.gov/popest/data/national/asrh/2011/files/NC-EST2011-ALLDATA-R-File02.csv>. Accessed January 15, 2013.
5. U.S. Census Bureau Population Division. Projected Population by Single Year of Age, Sex, Race, and Hispanic Origin for the United States: 2012 to 2060 (NP2012\_D1). 2012; [http://www.census.gov/population/projections/files/downloadables/NP2012\\_D1.csv](http://www.census.gov/population/projections/files/downloadables/NP2012_D1.csv) Accessed January 15, 2013.
6. U.S. Census Bureau Population Division. Methodology and Assumptions for the 2012 National Projections. 2012; December 2012;<http://www.census.gov/population/projections/files/methodology/methodstatement12.pdf>. Accessed January 15, 2013.
7. Centers for Disease Control and Prevention; National Center for Health Statistics. Underlying cause of death 1999-2010 on CDC WONDER online database, released 2012. 2012; <http://wonder.cdc.gov/ucd-icd10.html>. Accessed January 15, 2013.
8. National Center for Health Statistics. ICD10 Codes. 2004; [http://ftp.cdc.gov/pub/Health\\_Statistics/NCHS/Publications/ICD10/each10.txt](http://ftp.cdc.gov/pub/Health_Statistics/NCHS/Publications/ICD10/each10.txt). Accessed July 12, 2006.
9. Consensus recommendations for the management of chronic heart failure. On behalf of the membership of the advisory council to improve outcomes nationwide in heart failure. *The American journal of cardiology*. 1999;83:1A-38A.
10. Dawber TR. *The Framingham Study: the epidemiology of atherosclerotic disease*. Cambridge, MA: Harvard University Press; 1980.
11. Feinleib M, Kannel WB, Garrison RJ, McNamara PM, Castelli WP. The Framingham Offspring Study. Design and preliminary data. *Prev Med*. Dec 1975;4(4):518-525.
12. National Center for Health Statistics. National Health and Nutrition Examination Survey, 2009-2012. [http://www.cdc.gov/nchs/nhanes/search/nhanes09\\_10.aspx](http://www.cdc.gov/nchs/nhanes/search/nhanes09_10.aspx) & [http://www.cdc.gov/nchs/nhanes/search/nhanes11\\_12.aspx](http://www.cdc.gov/nchs/nhanes/search/nhanes11_12.aspx), 2012.
13. Brindle P, Emberson J, Lampe F, Walker M, Whincup P, Fahey T, Ebrahim S. Predictive accuracy of the Framingham coronary risk score in British men: prospective cohort study. *BMJ (Clinical research ed.)*. 2003;327:1267-1270.

14. D'Agostino RB, Grundy S, Sullivan LM, Wilson PW. Validation of the Framingham Coronary Heart Disease Prediction Scores. *JAMA : the journal of the American Medical Association*. 2001;286:180-187.
15. Liu J, Hong Y, D'Agostino RBS, Wu Z, Sun J, Wilson PW, Kannel WB, Zhao D. Predictive value for the Chinese population of the Framingham CHD risk assessment tool compared with the Chinese Multi-Provincial Cohort Study. *JAMA : the journal of the American Medical Association*. June 2 2004;291(21):2591-2599.
16. Wilson PW, D'Agostino RB, Levy D, Belanger AM, Silbershultz H, Kannel WB. Prediction of coronary heart disease using risk factor categories. *Circulation*. 1998;97:1837-1847.
17. Parish S, Collins R, Peto R, Youngman L, Barton J, Jayne K, Clarke R, Appleby P, Lyon V, Cederholm-Williams S, et al. Cigarette smoking, tar yields, and non-fatal myocardial infarction: 14,000 cases and 32,000 controls in the United Kingdom. The International Studies of Infarct Survival (ISIS) Collaborators. *BMJ (Clinical research ed.)*. August 19 1995;311(7003):471-477.
18. Law MR, Morris JK, Wald NJ. Environmental tobacco smoke exposure and ischaemic heart disease: an evaluation of the evidence. *BMJ (Clinical research ed.)*. 1997;315(7114):973-980.
19. Law MR, Morris JK, Wald NJ. Use of blood pressure lowering drugs in the prevention of cardiovascular disease: meta-analysis of 147 randomised trials in the context of expectations from prospective epidemiological studies. *BMJ (Clinical research ed)*. 2009;338:b1665.
20. When the beat is off--atrial fibrillation.  
[http://www.strokeassociation.org/STROKEORG/LifeAfterStroke/HealthyLivingAfterStroke/UnderstandingRiskyConditions/When-the-Beat-is-Off---Atrial-Fibrillation\\_UCM\\_310782\\_Article.jsp](http://www.strokeassociation.org/STROKEORG/LifeAfterStroke/HealthyLivingAfterStroke/UnderstandingRiskyConditions/When-the-Beat-is-Off---Atrial-Fibrillation_UCM_310782_Article.jsp). Accessed August 29, 2014.
21. National Center for Health Statistics. National Hospital Discharge Survey.  
[ftp://ftp.cdc.gov/pub/Health\\_Statistics/NCHS/Datasets/NHDS/](ftp://ftp.cdc.gov/pub/Health_Statistics/NCHS/Datasets/NHDS/) Accessed March 29, 2012.
22. Petersen LA, Wright S, Normand S-LT, Daley J. Positive predictive value of the diagnosis of acute myocardial infarction in an administrative database. *J Gen Intern Med*. 1999;14:555-558.
23. Canto JG, Rogers WJ, Goldberg RJ, Peterson ED, Wenger NK, Vaccarino V, Kiefe CI, Frederick PD, Sopko G, Zheng ZJ. Association of age and sex with myocardial infarction symptom presentation and in-hospital mortality. *JAMA : the journal of the American Medical Association*. Feb 22 2012;307(8):813-822.
24. Rieves D, Wright G, Gupta G, Shacter E. Clinical trial (GUSTO-1 and INJECT) evidence of earlier death for men than women after acute myocardial infarction. *The American journal of cardiology*. Jan 15 2000;85(2):147-153.
25. Vaccarino V, Parsons L, Peterson ED, Rogers WJ, Kiefe CI, Canto J. Sex differences in mortality after acute myocardial infarction: changes from 1994 to 2006. *Archives of internal medicine*. Oct 26 2009;169(19):1767-1774.
26. Centers for Disease Control and Prevention; National Center for Health Statistics. Underlying cause of death 1999-2010 on CDC WONDER online database, released 2012. 2012; <http://wonder.cdc.gov/mcd-icd10.html>. Accessed February 13, 2013.

27. Medical Expenditure Panel Survey. Medical Expenditure Panel Survey Public Use Files 1996-2001. <http://www.meps.ahrq.gov/Puf/PufSearch.asp?SearchOption=Keyword> March 2004 - February 2005.
28. Groeneveld PW, Heidenreich PA, Garber AM. Racial disparity in cardiac procedures and mortality among long-term survivors of cardiac arrest. *Circulation*. 2003;108:286-291.
29. Rea TD, Crouthamel M, Eisenberg MS, Becker LJ, Lima AR. Temporal patterns in long-term survival after resuscitation from out-of-hospital cardiac arrest. *Circulation*. 2003;108:1196-1201.
30. Williams GR, Jiang JG, Matchar DB, Samsa GP. Incidence and occurrence of total (first-ever and recurrent) stroke. *Stroke; a journal of cerebral circulation*. Dec 1999;30(12):2523-2528.
31. Rosamond WD, Folsom AR, Chambless LE, Wang CH, McGovern PG, Howard G, Copper LS, Shahar E. Stroke incidence and survival among middle-aged adults: 9-year follow-up of the Atherosclerosis Risk in Communities (ARIC) cohort. *Stroke; a journal of cerebral circulation*. Apr 1999;30(4):736-743.
32. The Atherosclerosis Risk in Communities (ARIC) Study: design and objectives. The ARIC investigators. *American journal of epidemiology*. Apr 1989;129(4):687-702.
33. Go AS, Mozaffarian D, Roger VL, Benjamin EJ, Berry JD, Blaha MJ, Dai S, Ford ES, Fox CS, Franco S, Fullerton HJ, Gillespie C, Hailpern SM, Heit JA, Howard VJ, Huffman MD, Judd SE, Kissela BM, Kittner SJ, Lackland DT, Lichtman JH, Lisabeth LD, Mackey RH, Magid DJ, Marcus GM, Marelli A, Matchar DB, McGuire DK, Mohler ER, 3rd, Moy CS, Mussolino ME, Neumar RW, Nichol G, Pandey DK, Paynter NP, Reeves MJ, Sorlie PD, Stein J, Towfighi A, Turan TN, Virani SS, Wong ND, Woo D, Turner MB. Heart disease and stroke statistics--2014 update: a report from the American Heart Association. *Circulation*. Jan 21 2014;129(3):e28-e292.
34. Witt BJ, Brown RD, Jr., Jacobsen SJ, Weston SA, Yawn BP, Roger VL. A community-based study of stroke incidence after myocardial infarction. *Annals of internal medicine*. Dec 6 2005;143(11):785-792.
35. Amarenco P, Bogousslavsky J, Callahan A, 3rd, Goldstein LB, Hennerici M, Rudolph AE, Sillensen H, Simunovic L, Szarek M, Welch KM, Zivin JA. High-dose atorvastatin after stroke or transient ischemic attack. *The New England journal of medicine*. Aug 10 2006;355(6):549-559.
36. Appelros P, Gunnarsson KE, Terent A. Ten-year risk for myocardial infarction in patients with first-ever stroke: a community-based study. *Acta neurologica Scandinavica*. Dec 2011;124(6):383-389.
37. Behar S, Tanne D, Abinader E, Agmon J, Barzilai J, Friedman Y, Kaplinsky E, Kauli N, Kishon Y, Palant A, et al. Cerebrovascular accident complicating acute myocardial infarction: incidence, clinical significance and short- and long-term mortality rates. The SPRINT Study Group. *The American journal of medicine*. Jul 1991;91(1):45-50.
38. Lakshminarayan K, Schissel C, Anderson DC, Vazquez G, Jacobs DR, Jr., Ezzeddine M, Luepker RV, Virnig BA. Five-year rehospitalization outcomes in a cohort of patients with acute ischemic stroke: Medicare linkage study. *Stroke; a journal of cerebral circulation*. Jun 2011;42(6):1556-1562.



39. Prosser J, MacGregor L, Lees KR, Diener HC, Hacke W, Davis S. Predictors of early cardiac morbidity and mortality after ischemic stroke. *Stroke; a journal of cerebral circulation*. Aug 2007;38(8):2295-2302.
40. Touze E, Varenne O, Chatellier G, Peyrard S, Rothwell PM, Mas JL. Risk of myocardial infarction and vascular death after transient ischemic attack and ischemic stroke: a systematic review and meta-analysis. *Stroke; a journal of cerebral circulation*. Dec 2005;36(12):2748-2755.
41. National Center for Health Statistics. National Health Interview Survey, 2009-2011. [ftp://ftp.cdc.gov/pub/Health\\_Statistics/NCHS/Datasets/NHIS/](ftp://ftp.cdc.gov/pub/Health_Statistics/NCHS/Datasets/NHIS/). Accessed June 12, 2012.
42. Bergmann MM, Byers T, Freedman DS, Mokdad AH. Validity of self-reported diagnoses leading to hospitalization: a comparison of self-reports with hospital records in a prospective study of American adults. *American journal of epidemiology*. 1998;147(10):969-977.
43. Ford ES, Giles WH. Changes in prevalence of nonfatal coronary heart disease in the United States from 1971-1994. *Ethnicity and Disease*. 2003;13:85-93.
44. Gross R, Bentur N, Elhayany A, Sherf M, Epstein L. The validity of self-reports on chronic disease: characteristics of underreporters and implications for the planning of services. *Public Health Reviews*. 1996;24:167-182.
45. Cholesterol, diastolic blood pressure, and stroke: 13,000 strokes in 450,000 people in 45 prospective cohorts. Prospective studies collaboration. *Lancet*. 1995;346(8991-8992):1647-1653.
46. Joint commission announces national patient safety goals. *J Pain Palliat Care Pharmacother*. 2003;17(1):116-119.
47. California Office of Statewide Health Planning & Development. Hospital financial data for cost to charge ratio, CA inpatient discharge data hospital annual financial data, pivot profiles. 1999-2000; <http://www.oshpd.ca.gov/HQAD/Hospital/financial/hospAF.htm> Accessed June, 2003.
48. Average cost to community hospitals per patient, by state (Table 204). *Statistical Abstract of the United States*. Bureau of the Census. Washington, D.C.: Government Printing Office; 1998:136.
49. Medical Expenditure Panel Survey. Medical Expenditure Panel Survey Public Use Files 1998-2008. <http://meps.ahrq.gov/mepsweb/>, 2010.
50. Moran AE, Forouzanfar MH, Roth G, Mensah G, Ezzati M, Murray CJ, Naghavi M. Temporal Trends in Ischemic Heart Disease Mortality in 21 World Regions, 1980-2010: The Global Burden of Disease 2010 Study. *Circulation*. Feb 26 2014.
51. Moran AE, Forouzanfar MH, Roth G, Mensah GA, Ezzati M, Flaxman A, Murray CJ, Naghavi M. The Global Burden of Ischemic Heart Disease in 1990 and 2010: The Global Burden of Disease 2010 Study. *Circulation*. Feb 26 2014.
52. Murray CJ, Vos T, Lozano R, Naghavi M, Flaxman AD, Michaud C, Ezzati M, Shibuya K, Salomon JA, Abdalla S, Aboyans V, Abraham J, Ackerman I, Aggarwal R, Ahn SY, Ali MK, Alvarado M, Anderson HR, Anderson LM, Andrews KG, Atkinson C, Baddour LM, Bahalim AN, Barker-Collo S, Barrero LH, Bartels DH, Basanez MG, Baxter A, Bell ML, Benjamin EJ, Bennett D, Bernabe E, Bhalla K, Bhandari B, Bikbov B, Bin Abdulhak A, Birbeck G, Black JA, Blencowe H, Blore JD, Blyth F, Bolliger I, Bonaventure A, Boufous S, Bourne R,

Boussinesq M, Braithwaite T, Brayne C, Bridgett L, Brooker S, Brooks P, Brugha TS, Bryan-Hancock C, Bucello C, Buchbinder R, Buckle G, Budke CM, Burch M, Burney P, Burstein R, Calabria B, Campbell B, Canter CE, Carabin H, Carapetis J, Carmona L, Cella C, Charlson F, Chen H, Cheng AT, Chou D, Chugh SS, Coffeng LE, Colan SD, Colquhoun S, Colson KE, Condon J, Connor MD, Cooper LT, Corriere M, Cortinovis M, de Vaccaro KC, Couser W, Cowie BC, Criqui MH, Cross M, Dabhadkar KC, Dahiya M, Dahodwala N, Damsere-Derry J, Danaei G, Davis A, De Leo D, Degenhardt L, Dellavalle R, Delossantos A, Denenberg J, Derrett S, Des Jarlais DC, Dharmaratne SD, Dherani M, Diaz-Torne C, Dolk H, Dorsey ER, Driscoll T, Duber H, Ebel B, Edmond K, Elbaz A, Ali SE, Erskine H, Erwin PJ, Espindola P, Ewoigbokhan SE, Farzadfar F, Feigin V, Felson DT, Ferrari A, Ferri CP, Fevre EM, Finucane MM, Flaxman S, Flood L, Foreman K, Forouzanfar MH, Fowkes FG, Fransen M, Freeman MK, Gabbe BJ, Gabriel SE, Gakidou E, Ganatra HA, Garcia B, Gaspari F, Gillum RF, Gmel G, Gonzalez-Medina D, Gosselin R, Grainger R, Grant B, Groeger J, Guillemin F, Gunnell D, Gupta R, Haagsma J, Hagan H, Halasa YA, Hall W, Haring D, Haro JM, Harrison JE, Havmoeller R, Hay RJ, Higashi H, Hill C, Hoen B, Hoffman H, Hotez PJ, Hoy D, Huang JJ, Ibeanusi SE, Jacobsen KH, James SL, Jarvis D, Jasrasaria R, Jayaraman S, Johns N, Jonas JB, Karthikeyan G, Kassebaum N, Kawakami N, Keren A, Khoo JP, King CH, Knowlton LM, Kobusingye O, Koranteng A, Krishnamurthi R, Laden F, Laloo R, Laslett LL, Lathlean T, Leasher JL, Lee YY, Leigh J, Levinson D, Lim SS, Limb E, Lin JK, Lipnick M, Lipshultz SE, Liu W, Loane M, Ohno SL, Lyons R, Mabweijano J, MacIntyre MF, Malekzadeh R, Mallinger L, Manivannan S, Marcenes W, March L, Margolis DJ, Marks GB, Marks R, Matsumori A, Matzopoulos R, Mayosi BM, McAnulty JH, McDermott MM, McGill N, McGrath J, Medina-Mora ME, Meltzer M, Mensah GA, Merriman TR, Meyer AC, Miglioli V, Miller M, Miller TR, Mitchell PB, Mock C, Mocumbi AO, Moffitt TE, Mokdad AA, Monasta L, Montico M, Moradi-Lakeh M, Moran A, Morawska L, Mori R, Murdoch ME, Mwaniki MK, Naidoo K, Nair MN, Naldi L, Narayan KM, Nelson PK, Nelson RG, Nevitt MC, Newton CR, Nolte S, Norman P, Norman R, O'Donnell M, O'Hanlon S, Olives C, Omer SB, Ortblad K, Osborne R, Ozgediz D, Page A, Pahari B, Pandian JD, Rivero AP, Patten SB, Pearce N, Padilla RP, Perez-Ruiz F, Perico N, Pesudovs K, Phillips D, Phillips MR, Pierce K, Pion S, Polanczyk GV, Polinder S, Pope CA, 3rd, Popova S, Porrini E, Pourmalek F, Prince M, Pullan RL, Ramaiah KD, Ranganathan D, Razavi H, Regan M, Rehm JT, Rein DB, Remuzzi G, Richardson K, Rivara FP, Roberts T, Robinson C, De Leon FR, Ronfani L, Room R, Rosenfeld LC, Rushton L, Sacco RL, Saha S, Sampson U, Sanchez-Riera L, Sanman E, Schwebel DC, Scott JG, Segui-Gomez M, Shahrz S, Shepard DS, Shin H, Shivakoti R, Singh D, Singh GM, Singh JA, Singleton J, Sleet DA, Sliwa K, Smith E, Smith JL, Stapelberg NJ, Steer A, Steiner T, Stolk WA, Stovner LJ, Sudfeld C, Syed S, Tamburlini G, Tavakkoli M, Taylor HR, Taylor JA, Taylor WJ, Thomas B, Thomson WM, Thurston GD, Tleyjeh IM, Tonelli M, Towbin JA, Truelsen T, Tsilimbaris MK, Ubeda C, Undurraga EA, van der Werf MJ, van Os J, Vavilala MS, Venketasubramanian N, Wang M, Wang W, Watt K, Weatherall DJ, Weinstock MA, Weintraub R, Weisskopf MG, Weissman MM, White RA, Whiteford H, Wiebe N, Wiersma ST, Wilkinson JD, Williams HC, Williams SR, Witt E, Wolfe F, Woolf AD, Wulf S, Yeh PH, Zaidi AK, Zheng ZJ, Zonies D, Lopez AD, AlMazroa MA, Memish ZA. Disability-adjusted life years (DALYs) for 291 diseases and

- injuries in 21 regions, 1990-2010: a systematic analysis for the Global Burden of Disease Study 2010. *Lancet*. Dec 15 2012;380(9859):2197-2223.
53. Heidenreich PA, Davis BR, Cutler JA, Furberg CD, Lairson DR, Shlipak MG, Pressel SL, Nwachuku C, Goldman L. Cost-effectiveness of chlorthalidone, amlodipine, and lisinopril as first-step treatment for patients with hypertension: an analysis of the Antihypertensive and Lipid-Lowering Treatment to Prevent Heart Attack Trial (ALLHAT). *Journal of general internal medicine*. May 2008;23(5):509-516.
  54. Lazar LD, Pletcher MJ, Coxson PG, Bibbins-Domingo K, Goldman L. Cost-effectiveness of statin therapy for primary prevention in a low-cost statin era. *Circulation*. Jul 12 2011;124(2):146-153.
  55. Greving JP, Visseren FL, de Wit GA, Algra A. Statin treatment for primary prevention of vascular disease: whom to treat? Cost-effectiveness analysis. *BMJ*. 2011;342:d1672.
  56. Red Book Drug References. 2014; <http://redbook.com/redbook/awp/>. Accessed May 2, 2014.
  57. California Office of Statewide Health Planning and Development Hospital Discharge Survey.
  58. U.S. Medical Expenditure Panel Survey. <http://meps.ahrq.gov/mepsweb/>. Accessed September 1, 2014.
  59. Law MR, Wald NJ, Morris JK, Jordan RE. Value of low dose combination treatment with blood pressure lowering drugs: analysis of 354 randomised trials. *BMJ (Clinical research ed)*. Jun 28 2003;326(7404):1427.
  60. Montgomery AA, Harding J, Fahey T. Shared decision making in hypertension: the impact of patient preferences on treatment choice. *Family practice*. Jun 2001;18(3):309-313.
  61. Salomon JA, Vos T, Hogan DR, Gagnon M, Naghavi M, Mokdad A, Begum N, Shah R, Karyana M, Kosen S, Farje MR, Moncada G, Dutta A, Sazawal S, Dyer A, Seiler J, Aboyans V, Baker L, Baxter A, Benjamin EJ, Bhalla K, Bin Abdulhak A, Blyth F, Bourne R, Braithwaite T, Brooks P, Brugha TS, Bryan-Hancock C, Buchbinder R, Burney P, Calabria B, Chen H, Chugh SS, Cooley R, Criqui MH, Cross M, Dabhadkar KC, Dahodwala N, Davis A, Degenhardt L, Diaz-Torne C, Dorsey ER, Driscoll T, Edmond K, Elbaz A, Ezzati M, Feigin V, Ferri CP, Flaxman AD, Flood L, Fransen M, Fuse K, Gabbe BJ, Gillum RF, Haagsma J, Harrison JE, Havmoeller R, Hay RJ, Hel-Baqui A, Hoek HW, Hoffman H, Hogeland E, Hoy D, Jarvis D, Karthikeyan G, Knowlton LM, Lathlean T, Leasher JL, Lim SS, Lipshultz SE, Lopez AD, Lozano R, Lyons R, Malekzadeh R, Marcenes W, March L, Margolis DJ, McGill N, McGrath J, Mensah GA, Meyer AC, Michaud C, Moran A, Mori R, Murdoch ME, Naldi L, Newton CR, Norman R, Omer SB, Osborne R, Pearce N, Perez-Ruiz F, Perico N, Pesudovs K, Phillips D, Pourmalek F, Prince M, Rehm JT, Remuzzi G, Richardson K, Room R, Saha S, Sampson U, Sanchez-Riera L, Segui-Gomez M, Shahrzad S, Shibuya K, Singh D, Sliwa K, Smith E, Soerjomataram I, Steiner T, Stolk WA, Stovner LJ, Sudfeld C, Taylor HR, Tleyjeh IM, van der Werf MJ, Watson WL, Weatherall DJ, Weintraub R, Weisskopf MG, Whiteford H, Wilkinson JD, Woolf AD, Zheng ZJ, Murray CJ. Common values in assessing health outcomes from disease and injury: disability weights measurement study for the Global Burden of Disease Study 2010. *Lancet*. Dec 15 2013;380(9859):2129-2143.
  62. Choudhry NK, Patrick AR, Glynn RJ, Avorn J. The cost-effectiveness of C-reactive protein testing and rosuvastatin treatment for patients with normal cholesterol levels. *J Am Coll Cardiol*. Feb 15 2011;57(7):784-791.
